# Supplementary material for: The design of Datascapes: toward a design framework for sonification for anomaly detection in AI-supported networked environments
Source: Frontiers journal article supplement (doi:10.3389/fcomp.2023.1254678), 2024-01-11
Supplement: Table_2.XLSX [file Table_2.XLSX]

## Sheet: Sheet 1 - Attack_16032012_h17
A	B	C	D	E	F	G	H	I	J	K	L	M	N	O	P
orig_h	resp_h	Year	Month	Day	Hour	Minute	$O-Anomaly	$O-AnomalyIndex	$O-PeerGroup	$O-Field-1	$O-FieldImpact-1	$O-Field-2	$O-FieldImpact-2	$O-Field-3	$O-FieldImpact-3
192.168.203.63	192168229101	2012	3	16	17	58	T	3.95078	1	Record_Count_transformed	0.176491	mehod_Count_transformed	0.176491	uri_Count_transformed	0.176491
192.168.203.63	192168229101	2012	3	16	18	1	T	3.62482	1	Record_Count_transformed	0.169081	mehod_Count_transformed	0.169081	uri_Count_transformed	0.169081
192.168.203.63	192168229101	2012	3	16	18	9	T	3.54861	1	Record_Count_transformed	0.169425	mehod_Count_transformed	0.169425	uri_Count_transformed	0.169425
192.168.203.63	192168229101	2012	3	16	17	52	T	3.53242	1	Record_Count_transformed	0.169382	mehod_Count_transformed	0.169382	uri_Count_transformed	0.169382
192.168.203.63	192168229101	2012	3	16	18	3	T	3.52559	1	Record_Count_transformed	0.167391	mehod_Count_transformed	0.167391	uri_Count_transformed	0.167391
192.168.203.63	192168229101	2012	3	16	18	11	T	3.51831	1	Record_Count_transformed	0.16915	mehod_Count_transformed	0.16915	uri_Count_transformed	0.16915
192.168.203.63	192168229101	2012	3	16	17	59	T	3.51717	1	Record_Count_transformed	0.167124	mehod_Count_transformed	0.167124	uri_Count_transformed	0.167124
192.168.203.63	192168229101	2012	3	16	17	50	T	3.47214	1	Record_Count_transformed	0.168438	mehod_Count_transformed	0.168438	uri_Count_transformed	0.168438
192.168.203.63	192168229101	2012	3	16	18	17	T	3.46409	1	Record_Count_transformed	0.168904	mehod_Count_transformed	0.168904	uri_Count_transformed	0.168904
192.168.203.63	192168229101	2012	3	16	17	55	T	3.46049	1	Record_Count_transformed	0.166939	mehod_Count_transformed	0.166939	uri_Count_transformed	0.166939
192.168.203.63	192168229101	2012	3	16	18	19	T	3.44833	1	Record_Count_transformed	0.168788	mehod_Count_transformed	0.168788	uri_Count_transformed	0.168788
192.168.203.63	192168229101	2012	3	16	17	54	T	3.43437	1	Record_Count_transformed	0.166576	mehod_Count_transformed	0.166576	uri_Count_transformed	0.166576
192.168.203.63	192168229101	2012	3	16	18	15	T	3.43074	1	Record_Count_transformed	0.167816	mehod_Count_transformed	0.167816	uri_Count_transformed	0.167816
192.168.203.63	192168229101	2012	3	16	18	37	T	3.42432	1	Record_Count_transformed	0.168567	mehod_Count_transformed	0.168567	uri_Count_transformed	0.168567
192.168.203.63	192168229101	2012	3	16	17	56	T	3.42386	1	Record_Count_transformed	0.165771	mehod_Count_transformed	0.165771	uri_Count_transformed	0.165771
192.168.203.63	192168229101	2012	3	16	18	0	T	3.42266	1	Record_Count_transformed	0.163983	mehod_Count_transformed	0.163983	uri_Count_transformed	0.163983
192.168.203.63	192168229101	2012	3	16	18	7	T	3.41112	1	Record_Count_transformed	0.165702	mehod_Count_transformed	0.165702	uri_Count_transformed	0.165702
192.168.203.63	192168229101	2012	3	16	18	2	T	3.40474	1	Record_Count_transformed	0.16416	mehod_Count_transformed	0.16416	uri_Count_transformed	0.16416
192.168.203.63	192168229101	2012	3	16	18	45	T	3.39604	1	Record_Count_transformed	0.166903	mehod_Count_transformed	0.166903	uri_Count_transformed	0.166903
192.168.203.63	192168229101	2012	3	16	18	29	T	3.39005	1	Record_Count_transformed	0.168028	mehod_Count_transformed	0.168028	uri_Count_transformed	0.168028
192.168.203.63	192168229101	2012	3	16	18	13	T	3.38324	1	Record_Count_transformed	0.166314	mehod_Count_transformed	0.166314	uri_Count_transformed	0.166314
192.168.203.63	192168229101	2012	3	16	18	27	T	3.37096	1	Record_Count_transformed	0.167524	mehod_Count_transformed	0.167524	uri_Count_transformed	0.167524
192.168.203.63	192168229101	2012	3	16	17	51	T	3.36711	1	Record_Count_transformed	0.165664	mehod_Count_transformed	0.165664	uri_Count_transformed	0.165664
192.168.203.63	192168229101	2012	3	16	18	23	T	3.36607	1	Record_Count_transformed	0.167193	mehod_Count_transformed	0.167193	uri_Count_transformed	0.167193
192.168.203.63	192168229101	2012	3	16	18	31	T	3.36215	1	Record_Count_transformed	0.167342	mehod_Count_transformed	0.167342	uri_Count_transformed	0.167342
192.168.203.63	192168229101	2012	3	16	18	35	T	3.3458	1	Record_Count_transformed	0.166795	mehod_Count_transformed	0.166795	uri_Count_transformed	0.166795
192.168.203.63	192168229101	2012	3	16	18	39	T	3.32488	1	Record_Count_transformed	0.165947	mehod_Count_transformed	0.165947	uri_Count_transformed	0.165947
192.168.203.63	192168229101	2012	3	16	18	43	T	3.32192	1	Record_Count_transformed	0.165368	mehod_Count_transformed	0.165368	uri_Count_transformed	0.165368
192.168.203.63	192168229101	2012	3	16	18	12	T	3.31422	1	Record_Count_transformed	0.164377	mehod_Count_transformed	0.164377	uri_Count_transformed	0.164377
192.168.203.63	192168229101	2012	3	16	18	41	T	3.31286	1	Record_Count_transformed	0.165412	mehod_Count_transformed	0.165412	uri_Count_transformed	0.165412
192.168.203.63	192168229101	2012	3	16	18	33	T	3.30203	1	Record_Count_transformed	0.165787	mehod_Count_transformed	0.165787	uri_Count_transformed	0.165787
192.168.203.63	192168229101	2012	3	16	18	28	T	3.28969	1	Record_Count_transformed	0.165512	mehod_Count_transformed	0.165512	uri_Count_transformed	0.165512
192.168.203.63	192168229101	2012	3	16	18	10	T	3.28322	1	Record_Count_transformed	0.163142	mehod_Count_transformed	0.163142	uri_Count_transformed	0.163142
192.168.203.63	192168229101	2012	3	16	18	25	T	3.27421	1	Record_Count_transformed	0.165001	mehod_Count_transformed	0.165001	uri_Count_transformed	0.165001
192.168.203.63	192168229101	2012	3	16	17	53	T	3.27238	1	Record_Count_transformed	0.162716	mehod_Count_transformed	0.162716	uri_Count_transformed	0.162716
192.168.203.63	192168229101	2012	3	16	18	4	T	3.24894	1	Record_Count_transformed	0.160658	mehod_Count_transformed	0.160658	uri_Count_transformed	0.160658
192.168.203.63	192168229101	2012	3	16	18	6	T	3.24488	1	Record_Count_transformed	0.161115	mehod_Count_transformed	0.161115	uri_Count_transformed	0.161115
192.168.203.63	192168229101	2012	3	16	18	42	T	3.23266	1	Record_Count_transformed	0.163178	mehod_Count_transformed	0.163178	uri_Count_transformed	0.163178
192.168.203.63	192168229101	2012	3	16	18	34	T	3.22461	1	Record_Count_transformed	0.163722	mehod_Count_transformed	0.163722	uri_Count_transformed	0.163722
192.168.203.63	192168229101	2012	3	16	18	36	T	3.21891	1	Record_Count_transformed	0.163449	mehod_Count_transformed	0.163449	uri_Count_transformed	0.163449
192.168.203.63	192168229101	2012	3	16	18	21	T	3.21668	1	Record_Count_transformed	0.163166	mehod_Count_transformed	0.163166	uri_Count_transformed	0.163166
192.168.203.63	192168229101	2012	3	16	18	38	T	3.21617	1	Record_Count_transformed	0.163207	mehod_Count_transformed	0.163207	uri_Count_transformed	0.163207
192.168.203.63	192168229101	2012	3	16	18	40	T	3.20154	1	Record_Count_transformed	0.162596	mehod_Count_transformed	0.162596	uri_Count_transformed	0.162596
192.168.203.63	192168229101	2012	3	16	18	26	T	3.17149	1	Record_Count_transformed	0.162298	mehod_Count_transformed	0.162298	uri_Count_transformed	0.162298
192.168.203.63	192168229101	2012	3	16	18	16	T	3.17086	1	Record_Count_transformed	0.161248	mehod_Count_transformed	0.161248	uri_Count_transformed	0.161248
192.168.203.63	192168229101	2012	3	16	18	44	T	3.16235	1	Record_Count_transformed	0.160936	mehod_Count_transformed	0.160936	uri_Count_transformed	0.160936
192.168.203.63	192168229101	2012	3	16	18	24	T	3.13266	1	Record_Count_transformed	0.161097	mehod_Count_transformed	0.161097	uri_Count_transformed	0.161097
192168202102	192.168.24.101	2012	3	16	18	10	T	3.13141	2	Record_Count_transformed	0.181717	mehod_Count_transformed	0.181717	uri_Count_transformed	0.181717
192.168.203.63	192168229101	2012	3	16	18	8	T	3.13123	1	Record_Count_transformed	0.158432	mehod_Count_transformed	0.158432	uri_Count_transformed	0.158432
192.168.203.63	192168229101	2012	3	16	18	32	T	3.12251	1	Record_Count_transformed	0.160978	mehod_Count_transformed	0.160978	uri_Count_transformed	0.160978
192.168.203.63	192168229101	2012	3	16	18	22	T	3.11882	1	Record_Count_transformed	0.160541	mehod_Count_transformed	0.160541	uri_Count_transformed	0.160541
192168202118	192.168.23.103	2012	3	16	18	25	T	3.11304	2	request_body_len_Mean_transformed	0.644825	orig_h	0.168223	resp_h	0.141738
192.168.203.63	192168229101	2012	3	16	18	20	T	3.07842	1	Record_Count_transformed	0.159154	mehod_Count_transformed	0.159154	uri_Count_transformed	0.159154
192.168.203.63	192168229101	2012	3	16	18	30	T	3.07638	1	Record_Count_transformed	0.159673	mehod_Count_transformed	0.159673	uri_Count_transformed	0.159673
192.168.203.63	192168229101	2012	3	16	18	14	T	3.04698	1	Record_Count_transformed	0.157278	mehod_Count_transformed	0.157278	uri_Count_transformed	0.157278
192.168.203.63	192168229101	2012	3	16	18	5	F	3.00622	1	Record_Count_transformed	0.153758	mehod_Count_transformed	0.153758	uri_Count_transformed	0.153758
192.168.203.63	192168229101	2012	3	16	18	18	F	2.97608	1	Record_Count_transformed	0.15576	mehod_Count_transformed	0.15576	uri_Count_transformed	0.15576
192168202110	192.168.28.202	2012	3	16	18	38	F	2.93609	2	resp_h	0.17756	Record_Count_transformed	0.169966	mehod_Count_transformed	0.169966
192.168.203.63	192168229101	2012	3	16	18	46	F	2.90796	1	Record_Count_transformed	0.152754	mehod_Count_transformed	0.152754	uri_Count_transformed	0.152754
192168202118	192.168.21.103	2012	3	16	18	12	F	2.80272	2	request_body_len_Mean_transformed	0.598331	orig_h	0.186849	resp_h	0.150662
192168202102	192168229101	2012	3	16	18	18	F	2.7053	2	Record_Count_transformed	0.182367	mehod_Count_transformed	0.182367	uri_Count_transformed	0.182367
192168202118	192.168.25.103	2012	3	16	18	28	F	2.58922	2	request_body_len_Mean_transformed	0.511218	resp_h	0.232983	orig_h	0.202256
192168202110	192.168.28.102	2012	3	16	18	20	F	1.99412	2	resp_h	0.28241	orig_h	0.134957	Record_Count_transformed	0.127128
192168202110	192.168.28.101	2012	3	16	18	17	F	1.9566	2	resp_h	0.241647	orig_h	0.137546	Record_Count_transformed	0.13516
192.168.203.63	192168229101	2012	3	16	17	57	F	1.87024	1	dia	0.15653	dia_semana	0.15653	orig_h	0.100373
2001:dbb:c18:204:20c:29ff:fe4e:9e86	2001:dbb:c18:655:20c:29ff:fe28:6955	2012	3	16	17	59	F	1.8496	2	orig_h	0.495487	resp_h	0.360037	minuto	0.106934
192.168.202.96	192.168.24.103	2012	3	16	18	29	F	1.76678	1	orig_h	0.227706	dia	0.165697	dia_semana	0.165697
192168202102	192.168.24.101	2012	3	16	18	9	F	1.75542	1	resp_h	0.181928	dia	0.166769	dia_semana	0.166769
192168202102	192.168.24.101	2012	3	16	18	6	F	1.69464	1	resp_h	0.188454	dia	0.172751	dia_semana	0.172751
192168202118	192.168.21.103	2012	3	16	18	14	F	1.69325	2	request_body_len_Mean_transformed	0.341099	orig_h	0.309279	resp_h	0.249381
192.168.202.96	192.168.24.103	2012	3	16	18	28	F	1.6889	2	resp_h	0.307315	orig_h	0.230266	Record_Count_transformed	0.095376
192168202110	192.168.28.202	2012	3	16	18	37	F	1.6833	1	orig_h	0.189723	dia	0.173914	dia_semana	0.173914
192168202110	192.168.28.102	2012	3	16	18	19	F	1.67143	1	orig_h	0.19107	resp_h	0.178367	dia	0.175149
192168202102	192.168.24.101	2012	3	16	18	8	F	1.66717	1	resp_h	0.191559	dia	0.175597	dia_semana	0.175597
192168202102	192.168.24.101	2012	3	16	18	7	F	1.60936	1	resp_h	0.198439	dia	0.181904	dia_semana	0.181904
192168202102	192.168.23.202	2012	3	16	17	50	F	1.59456	2	resp_h	0.268564	Record_Count_transformed	0.123954	mehod_Count_transformed	0.123954
192168202102	192.168.24.101	2012	3	16	18	5	F	1.5876	1	resp_h	0.201159	dia	0.184398	dia_semana	0.184398
192168202118	192.168.25.103	2012	3	16	18	35	F	1.57315	2	resp_h	0.383464	orig_h	0.33289	Record_Count_transformed	0.048246
192.168.202.97	192.168.28.252	2012	3	16	17	50	F	1.5318	2	orig_h	0.534593	resp_h	0.335908	minuto	0.084232
192168202118	192.168.25.103	2012	3	16	18	36	F	1.52998	2	resp_h	0.394282	orig_h	0.342282	hora	0.04877
192168202110	192.168.28.102	2012	3	16	18	18	F	1.52153	2	resp_h	0.37013	orig_h	0.176876	Record_Count_transformed	0.08802
192168202118	192.168.25.103	2012	3	16	18	30	F	1.5191	2	resp_h	0.397107	orig_h	0.344734	request_body_len_Mean_transformed	0.167428
192.168.26.254	192.168.202.78	2012	3	16	18	14	F	1.50366	2	orig_h	0.609481	resp_h	0.277664	minuto	0.062305
192168202118	192.168.23.103	2012	3	16	18	24	F	1.44293	2	orig_h	0.362932	resp_h	0.305792	Record_Count_transformed	0.058573
2001:dbb:c18:202:20c:29ff:fe93:571e	2001:dbb:c18:655:20c:29ff:fe47:e982	2012	3	16	18	46	F	1.4207	2	resp_h	0.505571	orig_h	0.36533	minuto	0.074722
192168202102	192.168.23.202	2012	3	16	17	51	F	1.40123	2	resp_h	0.305617	orig_h	0.128191	Record_Count_transformed	0.105411
2001:dbb:c18:202:20c:29ff:fe93:571e	2001:dbb:c18:655:20c:29ff:fe28:6955	2012	3	16	18	46	F	1.36835	2	resp_h	0.486662	orig_h	0.379305	minuto	0.077581
2001:dbb:c18:202:20c:29ff:fe93:571e	2001:dbb:c18:655:20c:29ff:fe1f:96f2	2012	3	16	18	46	F	1.36024	2	resp_h	0.483624	orig_h	0.381568	minuto	0.078043
2001:dbb:c18:202:20c:29ff:fe93:571e	2001:dbb:c18:655:391c:d28f:fa5d:495	2012	3	16	18	46	F	1.35271	2	resp_h	0.480742	orig_h	0.383693	minuto	0.078478
192168202125	192168229101	2012	3	16	18	20	F	1.33353	2	orig_h	0.468188	resp_h	0.298981	hora	0.055954
192.168.204.45	192.168.203.45	2012	3	16	18	4	F	1.29516	2	resp_h	0.592643	orig_h	0.230392	minuto	0.117316
192.168.25.100	192.168.202.82	2012	3	16	18	11	F	1.2946	2	orig_h	0.554814	resp_h	0.302088	minuto	0.083467
192.168.203.63	192.168.23.101	2012	3	16	18	25	F	1.28604	2	orig_h	0.539914	resp_h	0.350542	hora	0.05802
192.168.202.94	192.168.24.252	2012	3	16	17	56	F	1.2855	2	resp_h	0.432988	orig_h	0.379122	minuto	0.133959
192.168.203.63	192.168.23.101	2012	3	16	18	27	F	1.28452	2	orig_h	0.540554	resp_h	0.350957	hora	0.058089
192.168.203.63	192.168.23.101	2012	3	16	18	28	F	1.28388	2	orig_h	0.540825	resp_h	0.351133	hora	0.058118
192168202118	192.168.25.103	2012	3	16	18	33	F	1.27608	2	resp_h	0.472732	orig_h	0.410385	hora	0.058473
192168202118	192.168.25.103	2012	3	16	18	34	F	1.2758	2	resp_h	0.472838	orig_h	0.410477	hora	0.058486
192168202110	192.168.23.102	2012	3	16	18	43	F	1.27529	2	resp_h	0.462376	orig_h	0.211028	minuto	0.072229
192168202118	192.168.25.103	2012	3	16	18	31	F	1.27416	2	resp_h	0.473445	orig_h	0.411004	hora	0.058561
192168202118	192.168.25.103	2012	3	16	18	32	F	1.26716	2	resp_h	0.476062	orig_h	0.413275	hora	0.058885
192168202118	192.168.25.103	2012	3	16	18	27	F	1.26608	2	resp_h	0.476467	orig_h	0.413627	hora	0.058935
192168202118	192.168.25.103	2012	3	16	18	29	F	1.26521	2	resp_h	0.476794	orig_h	0.413911	hora	0.058976
192168202110	192.168.22.102	2012	3	16	18	28	F	1.26085	2	resp_h	0.482345	orig_h	0.213445	hora	0.05918
192.168.202.79	192.168.26.203	2012	3	16	17	56	F	1.25877	2	resp_h	0.560608	orig_h	0.24742	minuto	0.136804
192168202110	192.168.23.203	2012	3	16	18	46	F	1.25774	2	resp_h	0.437619	orig_h	0.213972	minuto	0.084404
192.168.202.79	192.168.27.102	2012	3	16	18	0	F	1.25618	2	resp_h	0.544556	orig_h	0.247929	minuto	0.146099
192.168.202.79	192.168.24.102	2012	3	16	17	54	F	1.25571	2	resp_h	0.571998	orig_h	0.248023	minuto	0.124734
192.168.202.79	192.168.25.101	2012	3	16	17	57	F	1.25568	2	resp_h	0.55297	orig_h	0.248029	minuto	0.143696
192.168.203.61	192.168.202.78	2012	3	16	17	52	F	1.25313	2	orig_h	0.498226	resp_h	0.333176	minuto	0.113505
192168202118	192.168.23.103	2012	3	16	18	23	F	1.24951	2	orig_h	0.419113	resp_h	0.353128	hora	0.059717
192.168.202.79	192.168.25.101	2012	3	16	17	56	F	1.24745	2	resp_h	0.556619	orig_h	0.249666	minuto	0.138046
192.168.202.79	192.168.27.202	2012	3	16	18	0	F	1.24676	2	resp_h	0.541105	orig_h	0.249803	minuto	0.147203
192.168.202.79	192.168.26.203	2012	3	16	17	54	F	1.24285	2	resp_h	0.56779	orig_h	0.25059	minuto	0.126024
192.168.202.79	192.168.27.102	2012	3	16	18	2	F	1.23989	2	resp_h	0.551711	orig_h	0.251187	minuto	0.134805
192.168.202.79	192.168.25.101	2012	3	16	17	55	F	1.23936	2	resp_h	0.560251	orig_h	0.251295	minuto	0.132543
192.168.202.79	192.168.27.152	2012	3	16	18	0	F	1.23815	2	resp_h	0.537839	orig_h	0.25154	minuto	0.148227
192.168.202.79	192.168.27.102	2012	3	16	18	3	F	1.23212	2	resp_h	0.555193	orig_h	0.252772	minuto	0.129367
192.168.202.79	192.168.25.101	2012	3	16	17	54	F	1.23175	2	resp_h	0.563713	orig_h	0.252847	minuto	0.12716
192.168.202.79	192.168.27.202	2012	3	16	18	2	F	1.23047	2	resp_h	0.548269	orig_h	0.25311	minuto	0.135837
192168202122	192.168.24.101	2012	3	16	18	7	F	1.22684	2	orig_h	0.432869	resp_h	0.397249	minuto	0.107071
192168202125	192168229101	2012	3	16	18	21	F	1.22526	2	orig_h	0.509559	resp_h	0.3254	hora	0.060899
192.168.202.79	192.168.27.202	2012	3	16	18	3	F	1.2224	2	resp_h	0.551889	orig_h	0.254781	minuto	0.130395
192.168.202.79	192.168.27.152	2012	3	16	18	2	F	1.22171	2	resp_h	0.545079	orig_h	0.254926	minuto	0.136812
192168202122	192.168.24.101	2012	3	16	18	8	F	1.2207	2	orig_h	0.435046	resp_h	0.399247	minuto	0.102474
192.168.202.79	192.168.26.102	2012	3	16	17	56	F	1.21902	2	resp_h	0.54628	orig_h	0.255488	minuto	0.141265
192.168.202.79	192.168.26.203	2012	3	16	17	50	F	1.21559	2	resp_h	0.580521	orig_h	0.256208	minuto	0.106143
192.168.202.79	192.168.27.152	2012	3	16	18	3	F	1.21402	2	resp_h	0.54853	orig_h	0.25654	minuto	0.131295
192168202118	192.168.21.103	2012	3	16	18	16	F	1.21104	2	orig_h	0.432425	resp_h	0.348677	minuto	0.070671
192.168.202.79	192.168.26.102	2012	3	16	17	55	F	1.21079	2	resp_h	0.549992	orig_h	0.257224	minuto	0.135671
192.168.202.79	192.168.26.102	2012	3	16	17	54	F	1.20331	2	resp_h	0.55341	orig_h	0.258822	minuto	0.130165
192.168.202.79	192.168.21.102	2012	3	16	17	55	F	1.19539	2	resp_h	0.544009	orig_h	0.260539	minuto	0.137419
192168202100	192.168.23.202	2012	3	16	18	2	F	1.19165	2	orig_h	0.43555	resp_h	0.359368	minuto	0.140262
192.168.202.79	192.168.26.103	2012	3	16	17	57	F	1.19153	2	resp_h	0.528981	orig_h	0.261383	minuto	0.151433
192168202122	192.168.24.101	2012	3	16	18	14	F	1.18935	2	orig_h	0.446513	resp_h	0.40977	minuto	0.07877
192.168.202.79	192.168.21.102	2012	3	16	17	54	F	1.18747	2	resp_h	0.547635	orig_h	0.262275	minuto	0.131901
192.168.202.79	192.168.26.101	2012	3	16	17	57	F	1.18543	2	resp_h	0.52668	orig_h	0.262727	minuto	0.152211
192168202122	192.168.24.101	2012	3	16	18	15	F	1.18499	2	orig_h	0.448157	resp_h	0.411279	minuto	0.075518
192168202100	192.168.23.202	2012	3	16	18	3	F	1.18382	2	orig_h	0.438432	resp_h	0.361746	minuto	0.134645
192.168.202.79	192.168.26.103	2012	3	16	17	56	F	1.18309	2	resp_h	0.532751	orig_h	0.263246	minuto	0.145555
192.168.202.79	192.168.27.203	2012	3	16	18	0	F	1.18017	2	resp_h	0.515317	orig_h	0.263898	minuto	0.155509
192.168.202.79	192.168.26.101	2012	3	16	17	56	F	1.17744	2	resp_h	0.530256	orig_h	0.264511	minuto	0.146254
192168202100	192.168.23.202	2012	3	16	18	4	F	1.17653	2	orig_h	0.441147	resp_h	0.363986	minuto	0.129144
192.168.202.79	192.168.26.103	2012	3	16	17	55	F	1.17527	2	resp_h	0.536298	orig_h	0.264998	minuto	0.139771
192.168.202.79	192.168.26.101	2012	3	16	17	55	F	1.1695	2	resp_h	0.533854	orig_h	0.266306	minuto	0.140461
192168202100	192.168.23.202	2012	3	16	18	5	F	1.16926	2	orig_h	0.44389	resp_h	0.366249	minuto	0.123827
192168202125	192168229101	2012	3	16	18	22	F	1.16814	2	orig_h	0.534474	resp_h	0.34131	hora	0.063876
192.168.202.79	192.168.26.103	2012	3	16	17	54	F	1.16731	2	resp_h	0.539955	orig_h	0.266805	minuto	0.13418
192168202125	192168229101	2012	3	16	18	23	F	1.16644	2	orig_h	0.535256	resp_h	0.34181	hora	0.06397
192168202125	192168229101	2012	3	16	18	24	F	1.16411	2	orig_h	0.536327	resp_h	0.342494	hora	0.064098
192.168.202.79	192.168.27.203	2012	3	16	18	2	F	1.16387	2	resp_h	0.522533	orig_h	0.267593	minuto	0.143609
192168202125	192168229101	2012	3	16	18	25	F	1.16357	2	orig_h	0.536577	resp_h	0.342653	hora	0.064128
192168202100	192.168.23.202	2012	3	16	18	6	F	1.16227	2	orig_h	0.446561	resp_h	0.368453	minuto	0.118669
192.168.202.79	192168229153	2012	3	16	18	15	F	1.16225	2	resp_h	0.588569	orig_h	0.267968	minuto	0.076995
192.168.203.64	192.168.23.101	2012	3	16	18	12	F	1.16194	2	orig_h	0.457047	resp_h	0.387983	minuto	0.088619
192.168.202.79	192.168.26.101	2012	3	16	17	54	F	1.16183	2	resp_h	0.53738	orig_h	0.268065	minuto	0.134813
192.168.202.79	192.168.22.102	2012	3	16	17	56	F	1.16118	2	resp_h	0.523744	orig_h	0.268213	minuto	0.148301
192168202122	192.168.23.101	2012	3	16	18	13	F	1.1573	2	orig_h	0.458878	resp_h	0.389537	minuto	0.084835
192.168.202.79	192.168.25.103	2012	3	16	17	56	F	1.15631	2	resp_h	0.5217	orig_h	0.269344	minuto	0.148926
192.168.202.79	192.168.25.102	2012	3	16	17	56	F	1.15627	2	resp_h	0.521718	orig_h	0.269354	minuto	0.148932
192.168.202.79	192.168.27.203	2012	3	16	18	3	F	1.15552	2	resp_h	0.526309	orig_h	0.269527	minuto	0.137942
192168202118	192.168.23.103	2012	3	16	18	22	F	1.15373	2	orig_h	0.453906	resp_h	0.382443	hora	0.064674
192.168.202.79	192.168.22.102	2012	3	16	17	55	F	1.15308	2	resp_h	0.527423	orig_h	0.270097	minuto	0.142461
192168202122	192.168.23.101	2012	3	16	18	14	F	1.15264	2	orig_h	0.460735	resp_h	0.391113	minuto	0.081279
192.168.202.79	192168229153	2012	3	16	18	18	F	1.15133	2	resp_h	0.594147	orig_h	0.270507	minuto	0.068328
192.168.202.79	192.168.25.103	2012	3	16	17	55	F	1.14817	2	resp_h	0.5254	orig_h	0.271254	minuto	0.143071
192.168.202.79	192.168.21.152	2012	3	16	17	55	F	1.14811	2	resp_h	0.525425	orig_h	0.271267	minuto	0.143078
192.168.203.64	192.168.202.78	2012	3	16	18	49	F	1.14805	2	orig_h	0.462575	resp_h	0.36367	minuto	0.107021
192.168.202.96	192.168.24.103	2012	3	16	18	25	F	1.14576	2	resp_h	0.452994	orig_h	0.339421	request_body_len_Mean_transformed	0.085599
192.168.202.79	192.168.22.102	2012	3	16	17	54	F	1.14556	2	resp_h	0.530888	orig_h	0.271872	minuto	0.136727
192.168.204.70	192.168.202.78	2012	3	16	17	59	F	1.14296	2	orig_h	0.401212	resp_h	0.365292	minuto	0.173048
192.168.202.79	192.168.23.102	2012	3	16	17	56	F	1.14275	2	resp_h	0.516001	orig_h	0.272539	minuto	0.150693
192168202118	192.168.21.103	2012	3	16	18	10	F	1.14225	2	orig_h	0.458467	resp_h	0.369676	minuto	0.099311
192.168.202.79	192.168.25.103	2012	3	16	17	54	F	1.1407	2	resp_h	0.52884	orig_h	0.27303	minuto	0.13731
192.168.202.79	192.168.21.152	2012	3	16	17	54	F	1.14055	2	resp_h	0.528908	orig_h	0.273065	minuto	0.137328
192.168.203.64	192.168.23.101	2012	3	16	18	18	F	1.13772	2	orig_h	0.466779	resp_h	0.396244	minuto	0.069146
192168202122	192168229101	2012	3	16	18	50	F	1.13598	2	orig_h	0.467492	resp_h	0.350974	minuto	0.113582
192168202118	192.168.21.103	2012	3	16	18	11	F	1.13189	2	orig_h	0.462665	resp_h	0.373061	minuto	0.095465
192168202100	192.168.23.202	2012	3	16	18	12	F	1.12719	2	orig_h	0.460456	resp_h	0.379918	minuto	0.091351
192.168.202.79	192.168.23.102	2012	3	16	17	54	F	1.12678	2	resp_h	0.523317	orig_h	0.276403	minuto	0.139006
192168202122	192.168.23.101	2012	3	16	18	35	F	1.12676	2	orig_h	0.471317	resp_h	0.400096	hora	0.066222
192.168.202.96	192.168.24.103	2012	3	16	18	27	F	1.12662	2	resp_h	0.460691	orig_h	0.345189	hora	0.066231
192.168.202.79	192.168.24.252	2012	3	16	17	58	F	1.12637	2	resp_h	0.494161	orig_h	0.276504	minuto	0.167763
192168202118	192.168.21.103	2012	3	16	18	15	F	1.12474	2	orig_h	0.465606	resp_h	0.375432	minuto	0.079563
192168202112	192.168.25.152	2012	3	16	18	42	F	1.12276	2	resp_h	0.507785	orig_h	0.345096	minuto	0.078399
192168202118	192.168.21.103	2012	3	16	18	13	F	1.12234	2	orig_h	0.466603	resp_h	0.376236	minuto	0.087478
192.168.203.64	192168229101	2012	3	16	18	10	F	1.12032	2	orig_h	0.474025	resp_h	0.355879	minuto	0.101255
192168202102	192168229101	2012	3	16	18	13	F	1.11812	2	resp_h	0.356581	orig_h	0.16065	minuto	0.087808
192.168.202.79	192.168.24.203	2012	3	16	17	57	F	1.11793	2	resp_h	0.497889	orig_h	0.27859	minuto	0.161402
192.168.202.79	192.168.24.252	2012	3	16	17	57	F	1.11787	2	resp_h	0.497917	orig_h	0.278606	minuto	0.161411
192168202118	192.168.23.103	2012	3	16	18	19	F	1.11741	2	orig_h	0.46866	resp_h	0.394874	minuto	0.067705
192.168.202.79	192168229251	2012	3	16	18	15	F	1.11476	2	resp_h	0.571047	orig_h	0.279384	minuto	0.080275
192168202118	192.168.23.103	2012	3	16	18	20	F	1.11429	2	orig_h	0.469972	resp_h	0.395979	hora	0.066963
192.168.202.79	192.168.23.203	2012	3	16	17	57	F	1.1118	2	resp_h	0.495064	orig_h	0.280128	minuto	0.162293
192168202118	192.168.23.103	2012	3	16	18	21	F	1.11142	2	orig_h	0.471187	resp_h	0.397003	hora	0.067136
192168202110	192.168.21.203	2012	3	16	18	31	F	1.11007	2	resp_h	0.579451	orig_h	0.242436	hora	0.067218
192.168.202.79	192.168.24.252	2012	3	16	17	56	F	1.10964	2	resp_h	0.50161	orig_h	0.280672	minuto	0.15519
192.168.202.79	192.168.25.152	2012	3	16	17	54	F	1.10726	2	resp_h	0.514892	orig_h	0.281274	minuto	0.141456
192168202110	192.168.22.203	2012	3	16	18	30	F	1.10519	2	resp_h	0.564922	orig_h	0.243508	hora	0.067515
192.168.202.79	192168229251	2012	3	16	18	18	F	1.10357	2	resp_h	0.576836	orig_h	0.282216	minuto	0.071285
192.168.202.79	192.168.23.203	2012	3	16	17	56	F	1.10347	2	resp_h	0.498801	orig_h	0.282242	minuto	0.156058
192.168.202.79	192.168.24.203	2012	3	16	17	55	F	1.10152	2	resp_h	0.505309	orig_h	0.282742	minuto	0.14913
192168202102	192.168.23.202	2012	3	16	18	8	F	1.09922	2	resp_h	0.389586	orig_h	0.163412	minuto	0.113799
192168202110	192.168.28.202	2012	3	16	18	36	F	1.09665	2	resp_h	0.475386	orig_h	0.245404	hora	0.068041
192.168.202.79	192.168.23.203	2012	3	16	17	55	F	1.09539	2	resp_h	0.502478	orig_h	0.284323	minuto	0.149964
192.168.202.79	192.168.24.252	2012	3	16	17	54	F	1.09406	2	resp_h	0.508754	orig_h	0.284669	minuto	0.143163
192.168.202.79	192.168.24.203	2012	3	16	17	54	F	1.09346	2	resp_h	0.509033	orig_h	0.284825	minuto	0.143242
192168202100	192168229101	2012	3	16	18	13	F	1.09293	2	orig_h	0.474892	resp_h	0.364799	minuto	0.089832
192.168.203.64	192.168.202.78	2012	3	16	18	23	F	1.0917	2	orig_h	0.486454	resp_h	0.382443	hora	0.068349
192.168.203.64	192.168.202.78	2012	3	16	18	33	F	1.09044	2	orig_h	0.487014	resp_h	0.382884	hora	0.068428
192168202100	192.168.23.202	2012	3	16	18	33	F	1.08899	2	orig_h	0.476611	resp_h	0.393247	hora	0.068519
192.168.202.79	192.168.27.101	2012	3	16	18	0	F	1.08899	2	resp_h	0.474535	orig_h	0.285995	minuto	0.16853
192.168.203.64	192168229101	2012	3	16	18	17	F	1.08897	2	orig_h	0.487674	resp_h	0.366126	minuto	0.075281
192.168.203.64	192.168.202.78	2012	3	16	18	32	F	1.08833	2	orig_h	0.487958	resp_h	0.383626	hora	0.068561
192.168.202.79	192.168.23.203	2012	3	16	17	54	F	1.0873	2	resp_h	0.506217	orig_h	0.286439	minuto	0.144053
192.168.202.79	192.168.24.253	2012	3	16	17	56	F	1.08671	2	resp_h	0.491051	orig_h	0.286594	minuto	0.158464
192.168.203.64	192168229101	2012	3	16	18	18	F	1.08566	2	orig_h	0.489161	resp_h	0.367242	minuto	0.072461
192168202112	192.168.23.202	2012	3	16	18	3	F	1.08317	2	resp_h	0.395357	orig_h	0.357708	minuto	0.147155
192.168.202.79	192.168.24.202	2012	3	16	17	56	F	1.08164	2	resp_h	0.488657	orig_h	0.287939	minuto	0.159208
192.168.203.64	192168229101	2012	3	16	18	38	F	1.08163	2	orig_h	0.490981	resp_h	0.368609	minuto	0.068991
192.168.202.79	192.168.27.253	2012	3	16	18	0	F	1.08034	2	resp_h	0.470356	orig_h	0.288284	minuto	0.169879
192168202122	192168229101	2012	3	16	18	36	F	1.07668	2	orig_h	0.493239	resp_h	0.370304	hora	0.069303
192.168.204.70	192.168.202.78	2012	3	16	18	49	F	1.07581	2	orig_h	0.426254	resp_h	0.388092	minuto	0.114208
192168202122	192168229101	2012	3	16	18	35	F	1.07461	2	orig_h	0.494192	resp_h	0.37102	hora	0.069436
192168202112	192.168.23.202	2012	3	16	17	58	F	1.07393	2	resp_h	0.398761	orig_h	0.360788	minuto	0.175955
192.168.202.79	192.168.24.202	2012	3	16	17	55	F	1.07341	2	resp_h	0.492403	orig_h	0.290146	minuto	0.153035
192168202122	192168229101	2012	3	16	18	34	F	1.07293	2	orig_h	0.494963	resp_h	0.371598	hora	0.069545
192.168.202.79	192.168.27.101	2012	3	16	18	2	F	1.07248	2	resp_h	0.481838	orig_h	0.290396	minuto	0.155847
192.168.202.79	192.168.24.103	2012	3	16	17	56	F	1.07208	2	resp_h	0.484126	orig_h	0.290505	minuto	0.160626
192.168.202.79	192.168.26.152	2012	3	16	17	56	F	1.07208	2	resp_h	0.484127	orig_h	0.290505	minuto	0.160627
192168202112	192.168.26.152	2012	3	16	18	42	F	1.07173	2	resp_h	0.484287	orig_h	0.36153	minuto	0.082132
192.168.202.96	192.168.24.103	2012	3	16	18	23	F	1.07117	2	resp_h	0.484537	orig_h	0.363056	hora	0.069659
192.168.202.79	192.168.24.253	2012	3	16	17	54	F	1.0708	2	resp_h	0.498348	orig_h	0.290853	minuto	0.146273
192.168.202.79	192.168.24.152	2012	3	16	17	56	F	1.06962	2	resp_h	0.483127	orig_h	0.291174	minuto	0.160996
192168202112	192.168.23.202	2012	3	16	18	1	F	1.06787	2	resp_h	0.401024	orig_h	0.362835	minuto	0.164053
192.168.202.79	192.168.24.252	2012	3	16	17	50	F	1.06652	2	resp_h	0.521889	orig_h	0.292019	minuto	0.120979
192.168.202.79	192.168.24.202	2012	3	16	17	54	F	1.06603	2	resp_h	0.495812	orig_h	0.292155	minuto	0.146928
192168202112	192.168.23.202	2012	3	16	17	57	F	1.06482	2	resp_h	0.402171	orig_h	0.363873	minuto	0.169452
192.168.202.79	192.168.27.101	2012	3	16	18	3	F	1.06465	2	resp_h	0.485383	orig_h	0.292533	minuto	0.149716
192.168.202.79	192.168.26.152	2012	3	16	17	55	F	1.06406	2	resp_h	0.487778	orig_h	0.292696	minuto	0.15438
192.168.202.79	192.168.24.103	2012	3	16	17	55	F	1.06391	2	resp_h	0.487843	orig_h	0.292735	minuto	0.154401
192.168.202.79	192.168.27.253	2012	3	16	18	2	F	1.06375	2	resp_h	0.477692	orig_h	0.29278	minuto	0.157127
192168202112	192.168.23.202	2012	3	16	18	2	F	1.06282	2	resp_h	0.402927	orig_h	0.364557	minuto	0.157263
192.168.202.79	192.168.24.152	2012	3	16	17	55	F	1.06192	2	resp_h	0.486629	orig_h	0.293284	minuto	0.154691
192168202110	192.168.21.102	2012	3	16	18	27	F	1.05874	2	resp_h	0.614224	orig_h	0.254191	hora	0.070477
192.168.202.79	192.168.26.253	2012	3	16	17	56	F	1.05871	2	resp_h	0.478025	orig_h	0.294174	minuto	0.162656
192168202110	192.168.21.102	2012	3	16	18	29	F	1.05828	2	resp_h	0.614493	orig_h	0.254302	hora	0.070508
192168202110	192.168.28.202	2012	3	16	18	35	F	1.05754	2	resp_h	0.492967	orig_h	0.254479	hora	0.070557
192.168.202.79	192.168.24.103	2012	3	16	17	54	F	1.05654	2	resp_h	0.49125	orig_h	0.294779	minuto	0.148248
192.168.202.79	192.168.26.152	2012	3	16	17	54	F	1.05622	2	resp_h	0.491396	orig_h	0.294867	minuto	0.148292
192.168.202.79	192.168.27.253	2012	3	16	18	3	F	1.05586	2	resp_h	0.481261	orig_h	0.294968	minuto	0.150962
192.168.202.79	192.168.24.152	2012	3	16	17	54	F	1.05415	2	resp_h	0.490215	orig_h	0.295445	minuto	0.148583
192168202110	192.168.21.203	2012	3	16	18	30	F	1.05413	2	resp_h	0.6102	orig_h	0.255301	hora	0.070785
192.168.202.96	192.168.24.103	2012	3	16	18	22	F	1.05356	2	resp_h	0.492638	orig_h	0.369126	hora	0.070823
192168202110	192.168.21.203	2012	3	16	18	29	F	1.05127	2	resp_h	0.611859	orig_h	0.255995	hora	0.070977
192.168.202.79	192.168.26.253	2012	3	16	17	55	F	1.05125	2	resp_h	0.481418	orig_h	0.296262	minuto	0.156261
192.168.202.96	192.168.24.103	2012	3	16	18	24	F	1.04941	2	resp_h	0.494584	orig_h	0.370584	hora	0.071103
192.168.202.96	192.168.24.103	2012	3	16	18	26	F	1.04906	2	resp_h	0.49475	orig_h	0.370708	hora	0.071127
192.168.202.79	192.168.24.101	2012	3	16	17	57	F	1.04869	2	resp_h	0.464735	orig_h	0.296986	minuto	0.172059
192168202112	192.168.23.202	2012	3	16	17	54	F	1.04665	2	resp_h	0.409155	orig_h	0.370192	minuto	0.149648
192168202110	192.168.28.101	2012	3	16	18	16	F	1.04587	2	resp_h	0.452069	orig_h	0.257318	minuto	0.081831
192168202112	192.168.23.202	2012	3	16	18	4	F	1.04456	2	resp_h	0.409973	orig_h	0.370932	minuto	0.145461
192.168.202.79	192.168.26.253	2012	3	16	17	54	F	1.04315	2	resp_h	0.485154	orig_h	0.298561	minuto	0.15015
192.168.204.70	192.168.202.78	2012	3	16	18	15	F	1.04246	2	orig_h	0.439888	resp_h	0.400506	minuto	0.085842
192.168.202.79	192.168.23.253	2012	3	16	17	56	F	1.04215	2	resp_h	0.469317	orig_h	0.298848	minuto	0.16524
192168202110	192.168.23.102	2012	3	16	18	44	F	1.04061	2	resp_h	0.566653	orig_h	0.25862	minuto	0.092733
192168202112	192.168.23.202	2012	3	16	18	5	F	1.04033	2	resp_h	0.411639	orig_h	0.37244	minuto	0.139173
192168202110	192.168.22.203	2012	3	16	18	35	F	1.0384	2	resp_h	0.601255	orig_h	0.259169	hora	0.071858
192168202110	192.168.22.203	2012	3	16	18	32	F	1.03422	2	resp_h	0.603687	orig_h	0.260218	hora	0.072148
192168202112	192.168.23.202	2012	3	16	17	53	F	1.03392	2	resp_h	0.414191	orig_h	0.374749	minuto	0.144387
192168202110	192.168.22.203	2012	3	16	18	29	F	1.03242	2	resp_h	0.60474	orig_h	0.260671	hora	0.072274
192.168.202.79	192.168.24.101	2012	3	16	17	55	F	1.03228	2	resp_h	0.47212	orig_h	0.301705	minuto	0.159132
192.168.202.79	192.168.26.202	2012	3	16	17	55	F	1.03227	2	resp_h	0.472123	orig_h	0.301707	minuto	0.159133
192.168.202.79	192.168.26.152	2012	3	16	17	50	F	1.02894	2	resp_h	0.504426	orig_h	0.302686	minuto	0.125398
192168202112	192.168.23.202	2012	3	16	17	52	F	1.02734	2	resp_h	0.416843	orig_h	0.377148	minuto	0.138451
192.168.202.79	192.168.23.253	2012	3	16	17	54	F	1.0263	2	resp_h	0.476568	orig_h	0.303465	minuto	0.152616
192.168.202.79	192.168.24.101	2012	3	16	17	54	F	1.02482	2	resp_h	0.475559	orig_h	0.303903	minuto	0.152836
192.168.202.79	192.168.26.202	2012	3	16	17	54	F	1.02475	2	resp_h	0.47559	orig_h	0.303923	minuto	0.152846
192168202110	192.168.22.102	2012	3	16	18	30	F	1.02473	2	resp_h	0.593488	orig_h	0.262628	hora	0.072816
192.168.28.100	192.168.202.82	2012	3	16	18	8	F	1.0247	2	orig_h	0.420953	resp_h	0.381656	minuto	0.122074
192168202110	192.168.23.102	2012	3	16	18	42	F	1.02425	2	resp_h	0.575703	orig_h	0.26275	minuto	0.085939
192168202110	192.168.21.152	2012	3	16	18	30	F	1.02163	2	resp_h	0.590473	orig_h	0.263423	hora	0.073037
192.168.202.79	192.168.22.253	2012	3	16	17	56	F	1.02142	2	resp_h	0.45852	orig_h	0.304912	minuto	0.168593
192168202110	192.168.23.102	2012	3	16	18	41	F	1.02001	2	resp_h	0.578094	orig_h	0.263841	minuto	0.082577
192168202110	192.168.23.203	2012	3	16	18	47	F	1.01966	2	resp_h	0.539798	orig_h	0.263933	minuto	0.109283
192.168.28.100	192.168.202.82	2012	3	16	18	9	F	1.01873	2	orig_h	0.423422	resp_h	0.383894	minuto	0.116926
192168202110	192.168.22.102	2012	3	16	18	27	F	1.01739	2	resp_h	0.597768	orig_h	0.264521	hora	0.073341
192168202110	192.168.22.102	2012	3	16	18	26	F	1.01729	2	resp_h	0.597828	orig_h	0.264548	hora	0.073349
192168202110	192.168.21.152	2012	3	16	18	31	F	1.01692	2	resp_h	0.593211	orig_h	0.264644	hora	0.073375
192.168.204.70	192.168.202.78	2012	3	16	18	32	F	1.01622	2	orig_h	0.451246	resp_h	0.410847	hora	0.073425
192.168.202.79	192.168.26.253	2012	3	16	17	50	F	1.01594	2	resp_h	0.498151	orig_h	0.30656	minuto	0.127003
192168202100	192.168.21.253	2012	3	16	18	49	F	1.01592	2	orig_h	0.510889	resp_h	0.292131	minuto	0.12094
192.168.202.79	192.168.25.253	2012	3	16	17	56	F	1.0141	2	resp_h	0.45486	orig_h	0.307113	minuto	0.16981
192168202112	192.168.25.253	2012	3	16	18	42	F	1.01388	2	resp_h	0.45496	orig_h	0.382156	minuto	0.086818
192168202110	192.168.23.102	2012	3	16	18	39	F	1.01351	2	resp_h	0.581805	orig_h	0.265535	minuto	0.076496
192.168.202.79	192.168.22.253	2012	3	16	17	55	F	1.01347	2	resp_h	0.462119	orig_h	0.307306	minuto	0.162086
192168202110	192.168.23.203	2012	3	16	18	48	F	1.01343	2	resp_h	0.543118	orig_h	0.265556	minuto	0.115451
192.168.28.100	192.168.202.82	2012	3	16	18	10	F	1.01305	2	orig_h	0.425795	resp_h	0.386045	minuto	0.111977
192168202110	192.168.21.152	2012	3	16	18	32	F	1.01249	2	resp_h	0.595802	orig_h	0.2658	hora	0.073696
192168202110	192.168.28.102	2012	3	16	18	12	F	1.01238	2	resp_h	0.556273	orig_h	0.26583	minuto	0.101711
192168202103	192.168.24.101	2012	3	16	18	2	F	1.01228	2	resp_h	0.481449	orig_h	0.277307	minuto	0.165116
192168202110	192.168.21.152	2012	3	16	18	27	F	1.01172	2	resp_h	0.596255	orig_h	0.266002	hora	0.073752
192168202110	192.168.23.102	2012	3	16	18	38	F	1.01066	2	resp_h	0.583443	orig_h	0.266283	minuto	0.073836
192168202110	192.168.21.152	2012	3	16	18	29	F	1.01019	2	resp_h	0.597161	orig_h	0.266407	hora	0.073864
192168202100	192.168.21.253	2012	3	16	18	48	F	1.01006	2	orig_h	0.513855	resp_h	0.293828	minuto	0.115836
192.168.202.79	192.168.25.253	2012	3	16	17	55	F	1.00614	2	resp_h	0.45846	orig_h	0.309544	minuto	0.163267
192.168.202.79	192.168.22.253	2012	3	16	17	54	F	1.00506	2	resp_h	0.465985	orig_h	0.309877	minuto	0.155841
192168202112	192.168.22.152	2012	3	16	18	43	F	1.00492	2	resp_h	0.446147	orig_h	0.385564	minuto	0.091662
192168202100	192.168.21.253	2012	3	16	18	47	F	1.00449	2	orig_h	0.516704	resp_h	0.295457	minuto	0.110933
192.168.202.79	192.168.23.101	2012	3	16	17	56	F	1.00391	2	resp_h	0.449059	orig_h	0.310233	minuto	0.171535
192.168.202.79	192.168.22.152	2012	3	16	17	56	F	1.00137	2	resp_h	0.447727	orig_h	0.311018	minuto	0.171969
192168202100	192.168.21.253	2012	3	16	18	46	F	0.999214	2	orig_h	0.519431	resp_h	0.297016	minuto	0.106241
192.168.202.79	192.168.25.253	2012	3	16	17	54	F	0.998388	2	resp_h	0.46202	orig_h	0.311948	minuto	0.156882
192168202110	192.168.23.203	2012	3	16	18	45	F	0.997805	2	resp_h	0.55162	orig_h	0.269713	minuto	0.101403
192.168.202.79	192.168.26.202	2012	3	16	17	50	F	0.99727	2	resp_h	0.488695	orig_h	0.312297	minuto	0.12938
192.168.28.100	192.168.202.82	2012	3	16	18	44	F	0.996112	2	orig_h	0.433036	resp_h	0.392611	minuto	0.096875
192.168.202.79	192.168.23.101	2012	3	16	17	55	F	0.995705	2	resp_h	0.452757	orig_h	0.312788	minuto	0.164978
192.168.202.79	192.168.23.103	2012	3	16	17	56	F	0.99433	2	resp_h	0.443753	orig_h	0.313221	minuto	0.173187
192168202100	192.168.21.253	2012	3	16	18	45	F	0.994237	2	orig_h	0.522032	resp_h	0.298503	minuto	0.101767
192.168.28.100	192.168.202.82	2012	3	16	18	14	F	0.993299	2	orig_h	0.434262	resp_h	0.393722	minuto	0.094318
192168202110	192.168.23.203	2012	3	16	18	44	F	0.993002	2	resp_h	0.554288	orig_h	0.271018	minuto	0.097178
192168202103	192.168.24.101	2012	3	16	18	5	F	0.990055	2	resp_h	0.492256	orig_h	0.283532	minuto	0.14624
192168202100	192.168.21.253	2012	3	16	18	44	F	0.989555	2	orig_h	0.524502	resp_h	0.299915	minuto	0.097517
192168202110	192.168.23.203	2012	3	16	18	43	F	0.988823	2	resp_h	0.556631	orig_h	0.272163	minuto	0.093154
192.168.202.79	192.168.23.101	2012	3	16	17	54	F	0.988297	2	resp_h	0.456151	orig_h	0.315133	minuto	0.158484
192.168.202.79	192.168.22.152	2012	3	16	17	54	F	0.985858	2	resp_h	0.454773	orig_h	0.315912	minuto	0.158876
192168202100	192.168.21.253	2012	3	16	18	43	F	0.985169	2	orig_h	0.526837	resp_h	0.301251	minuto	0.093499
192168202110	192.168.23.203	2012	3	16	18	42	F	0.984746	2	resp_h	0.558936	orig_h	0.27329	minuto	0.089386
192168202110	192.168.23.253	2012	3	16	18	45	F	0.982959	2	resp_h	0.497579	orig_h	0.273787	minuto	0.102934
192168202100	192.168.21.253	2012	3	16	18	42	F	0.981079	2	orig_h	0.529033	resp_h	0.302506	minuto	0.08972
192168202110	192.168.23.203	2012	3	16	18	41	F	0.981014	2	resp_h	0.561062	orig_h	0.27433	minuto	0.085859
192.168.28.100	192.168.202.82	2012	3	16	18	40	F	0.980345	2	orig_h	0.440001	resp_h	0.398925	minuto	0.08235
192.168.202.79	192.168.23.103	2012	3	16	17	54	F	0.978406	2	resp_h	0.450975	orig_h	0.318319	minuto	0.160086
192168202100	192.168.21.253	2012	3	16	18	41	F	0.977285	2	orig_h	0.531087	resp_h	0.303681	minuto	0.086187
192.168.28.100	192.168.202.82	2012	3	16	18	39	F	0.977143	2	orig_h	0.441443	resp_h	0.400232	minuto	0.079343
192168202110	192.168.28.101	2012	3	16	18	19	F	0.977072	2	resp_h	0.483901	orig_h	0.275436	minuto	0.077429
192.168.202.79	192.168.21.103	2012	3	16	17	56	F	0.975356	2	resp_h	0.432933	orig_h	0.319314	minuto	0.176556
192.168.202.79	192168229101	2012	3	16	18	8	F	0.974602	2	resp_h	0.40909	orig_h	0.319561	minuto	0.12835
192.168.28.100	192.168.202.82	2012	3	16	18	38	F	0.974237	2	orig_h	0.442759	resp_h	0.401426	minuto	0.076597
192168202100	192.168.21.253	2012	3	16	18	40	F	0.973787	2	orig_h	0.532994	resp_h	0.304772	minuto	0.082904
192.168.202.79	192.168.23.202	2012	3	16	17	55	F	0.973361	2	resp_h	0.439961	orig_h	0.319968	minuto	0.168765
192168202112	192.168.23.103	2012	3	16	18	24	F	0.970838	2	resp_h	0.45449	orig_h	0.399099	hora	0.076858
192168202100	192.168.21.253	2012	3	16	18	39	F	0.970585	2	orig_h	0.534753	resp_h	0.305777	minuto	0.079879
192168202110	192.168.22.253	2012	3	16	18	33	F	0.970257	2	resp_h	0.4827	orig_h	0.277371	hora	0.076904
192.168.202.79	192168229101	2012	3	16	18	5	F	0.967826	2	resp_h	0.411954	orig_h	0.321798	minuto	0.149599
192168202112	192.168.23.103	2012	3	16	18	28	F	0.967791	2	resp_h	0.455921	orig_h	0.400355	hora	0.0771
192168202100	192.168.21.253	2012	3	16	18	38	F	0.96768	2	orig_h	0.536359	resp_h	0.306695	minuto	0.077116
192.168.202.79	192.168.21.103	2012	3	16	17	55	F	0.967183	2	resp_h	0.436591	orig_h	0.322012	minuto	0.169843
192.168.28.100	192.168.202.82	2012	3	16	18	23	F	0.96617	2	orig_h	0.446456	resp_h	0.404778	hora	0.077229
192.168.202.79	192.168.23.202	2012	3	16	17	54	F	0.965432	2	resp_h	0.443574	orig_h	0.322596	minuto	0.162237
192168202100	192.168.21.253	2012	3	16	18	37	F	0.96507	2	orig_h	0.537809	resp_h	0.307525	hora	0.077318
192.168.28.100	192.168.202.82	2012	3	16	18	24	F	0.964635	2	orig_h	0.447166	resp_h	0.405422	hora	0.077352
192.168.202.80	192.168.21.253	2012	3	16	17	59	F	0.964295	2	orig_h	0.415108	resp_h	0.307772	minuto	0.205109
192.168.28.100	192.168.202.82	2012	3	16	18	25	F	0.963397	2	orig_h	0.447741	resp_h	0.405943	hora	0.077452
192168202100	192.168.21.253	2012	3	16	18	36	F	0.962756	2	orig_h	0.539102	resp_h	0.308264	hora	0.077503
192.168.28.100	192.168.202.82	2012	3	16	18	29	F	0.961404	2	orig_h	0.448669	resp_h	0.406784	hora	0.077612
192168202100	192.168.21.253	2012	3	16	18	35	F	0.960738	2	orig_h	0.540234	resp_h	0.308911	hora	0.077666
192.168.202.79	192.168.21.103	2012	3	16	17	54	F	0.959569	2	resp_h	0.440055	orig_h	0.324567	minuto	0.163229
192168202110	192.168.23.101	2012	3	16	18	43	F	0.95956	2	resp_h	0.469812	orig_h	0.280463	minuto	0.095995
192168202100	192.168.21.253	2012	3	16	18	34	F	0.959016	2	orig_h	0.541204	resp_h	0.309466	hora	0.077806
192.168.202.80	192.168.21.253	2012	3	16	18	0	F	0.957846	2	orig_h	0.417902	resp_h	0.309844	minuto	0.191604
192168202100	192.168.21.253	2012	3	16	18	33	F	0.957209	2	orig_h	0.542225	resp_h	0.31005	hora	0.077952
192168202110	192.168.28.202	2012	3	16	18	15	F	0.957095	2	resp_h	0.544701	orig_h	0.281186	minuto	0.093499
192.168.202.80	192.168.21.253	2012	3	16	17	58	F	0.955472	2	orig_h	0.418941	resp_h	0.310614	minuto	0.197769
192168202100	192.168.21.253	2012	3	16	18	32	F	0.955376	2	orig_h	0.543266	resp_h	0.310645	hora	0.078102
192168202103	192.168.24.101	2012	3	16	18	11	F	0.953352	2	resp_h	0.511208	orig_h	0.294448	minuto	0.113344
192.168.202.80	192.168.21.253	2012	3	16	18	1	F	0.949507	2	orig_h	0.421573	resp_h	0.312565	minuto	0.184504
192.168.203.64	192.168.201.2	2012	3	16	18	20	F	0.948969	2	orig_h	0.559619	resp_h	0.281242	hora	0.078629
192.168.202.80	192.168.21.253	2012	3	16	17	57	F	0.946945	2	orig_h	0.422713	resp_h	0.313411	minuto	0.190545
192.168.202.79	192168229101	2012	3	16	18	3	F	0.946625	2	resp_h	0.42118	orig_h	0.329005	minuto	0.168382
192.168.203.64	192.168.201.2	2012	3	16	18	21	F	0.945557	2	orig_h	0.561639	resp_h	0.282257	hora	0.078913
192168202110	192.168.28.202	2012	3	16	18	39	F	0.944678	2	resp_h	0.551861	orig_h	0.284882	minuto	0.082069
192.168.203.64	192.168.201.2	2012	3	16	18	22	F	0.943493	2	orig_h	0.562867	resp_h	0.282874	hora	0.079086
192168202110	192.168.23.253	2012	3	16	18	46	F	0.9415	2	resp_h	0.51949	orig_h	0.285843	minuto	0.112754
192.168.202.80	192.168.21.253	2012	3	16	18	2	F	0.941463	2	orig_h	0.425175	resp_h	0.315236	minuto	0.177536
192.168.203.64	192.168.201.2	2012	3	16	18	24	F	0.940186	2	orig_h	0.564847	resp_h	0.283869	hora	0.079364
192.168.202.79	192168229101	2012	3	16	18	4	F	0.939068	2	resp_h	0.424569	orig_h	0.331653	minuto	0.161801
192.168.202.80	192.168.21.253	2012	3	16	17	56	F	0.938714	2	orig_h	0.42642	resp_h	0.316159	minuto	0.183448
192168202110	192.168.21.253	2012	3	16	18	33	F	0.936843	2	resp_h	0.31679	orig_h	0.287264	hora	0.079647
192.168.202.79	192168229101	2012	3	16	18	6	F	0.935215	2	resp_h	0.426318	orig_h	0.333019	minuto	0.147479
192.168.202.80	192.168.21.253	2012	3	16	18	3	F	0.933714	2	orig_h	0.428703	resp_h	0.317852	minuto	0.170711
192168202110	192.168.23.253	2012	3	16	18	44	F	0.931112	2	resp_h	0.525286	orig_h	0.289032	minuto	0.103638
192.168.202.80	192.168.21.253	2012	3	16	17	55	F	0.930778	2	orig_h	0.430055	resp_h	0.318854	minuto	0.176486
192168202110	192.168.23.253	2012	3	16	18	43	F	0.927453	2	resp_h	0.527358	orig_h	0.290172	minuto	0.099318
192168202103	192.168.22.202	2012	3	16	17	59	F	0.9264	2	resp_h	0.408624	orig_h	0.303014	minuto	0.213499
192.168.202.79	192168229101	2012	3	16	18	7	F	0.926327	2	resp_h	0.430409	orig_h	0.336215	minuto	0.141807
192.168.202.80	192.168.21.253	2012	3	16	18	4	F	0.926262	2	orig_h	0.432152	resp_h	0.320409	minuto	0.164038
192168202110	192.168.23.103	2012	3	16	18	43	F	0.925443	2	resp_h	0.476784	orig_h	0.290802	minuto	0.099534
192.168.202.80	192.168.21.253	2012	3	16	17	54	F	0.923138	2	orig_h	0.433614	resp_h	0.321493	minuto	0.16967
192168202110	192.168.28.101	2012	3	16	18	12	F	0.922026	2	resp_h	0.51279	orig_h	0.29188	minuto	0.111678
192.168.202.87	192.168.201.2	2012	3	16	18	4	F	0.921293	2	orig_h	0.461539	resp_h	0.289691	minuto	0.164923
192168202103	192.168.22.202	2012	3	16	18	0	F	0.919951	2	resp_h	0.411488	orig_h	0.305138	minuto	0.199497
192.168.202.90	192.168.201.2	2012	3	16	18	4	F	0.919153	2	orig_h	0.460465	resp_h	0.290365	minuto	0.165307
192168202103	192.168.22.202	2012	3	16	17	58	F	0.917577	2	resp_h	0.412553	orig_h	0.305928	minuto	0.205937
192.168.202.87	192.168.201.2	2012	3	16	18	5	F	0.916369	2	orig_h	0.464019	resp_h	0.291247	minuto	0.157999
192.168.202.80	192.168.21.253	2012	3	16	17	53	F	0.915794	2	orig_h	0.437092	resp_h	0.324071	minuto	0.163011
192168202110	192.168.23.202	2012	3	16	18	46	F	0.915387	2	resp_h	0.467825	orig_h	0.293997	minuto	0.11597
192168202110	192.168.22.253	2012	3	16	18	32	F	0.912733	2	resp_h	0.513122	orig_h	0.294852	hora	0.081751
192168202103	192.168.22.202	2012	3	16	18	1	F	0.911611	2	resp_h	0.415253	orig_h	0.30793	minuto	0.192173
192168202103	192.168.23.101	2012	3	16	18	12	F	0.91158	2	resp_h	0.49454	orig_h	0.307941	minuto	0.112958
192.168.203.45	192.168.201.2	2012	3	16	18	47	F	0.910897	2	orig_h	0.500521	resp_h	0.292997	minuto	0.122331
192168202103	192.168.22.202	2012	3	16	17	57	F	0.90905	2	resp_h	0.416423	orig_h	0.308798	minuto	0.198489
192.168.202.80	192.168.21.253	2012	3	16	17	52	F	0.908746	2	orig_h	0.440482	resp_h	0.326585	minuto	0.15652
192.168.202.79	192168229101	2012	3	16	18	9	F	0.905716	2	resp_h	0.440204	orig_h	0.343866	minuto	0.131516
192168202103	192.168.22.202	2012	3	16	18	2	F	0.903567	2	resp_h	0.41895	orig_h	0.310671	minuto	0.184982
192.168.202.80	192.168.21.253	2012	3	16	17	51	F	0.901993	2	orig_h	0.44378	resp_h	0.32903	minuto	0.150205
192168202110	192.168.22.253	2012	3	16	18	34	F	0.901629	2	resp_h	0.519441	orig_h	0.298483	hora	0.082758
192168202103	192.168.22.202	2012	3	16	17	56	F	0.900819	2	resp_h	0.420228	orig_h	0.311619	minuto	0.191165
192.168.202.79	192168229101	2012	3	16	18	10	F	0.8997	2	resp_h	0.443147	orig_h	0.346165	minuto	0.126084
192.168.202.90	192.168.201.2	2012	3	16	18	7	F	0.899324	2	orig_h	0.470618	resp_h	0.296767	minuto	0.146064
192168202110	192.168.28.101	2012	3	16	18	18	F	0.896795	2	resp_h	0.527217	orig_h	0.300092	minuto	0.087722
192168202102	192.168.24.101	2012	3	16	18	4	F	0.896121	2	resp_h	0.543856	orig_h	0.200448	minuto	0.169556
192168202103	192.168.22.202	2012	3	16	18	3	F	0.895819	2	resp_h	0.422573	orig_h	0.313358	minuto	0.177932
192.168.202.79	192168229101	2012	3	16	18	11	F	0.894238	2	resp_h	0.445854	orig_h	0.34828	minuto	0.120836
192168202103	192.168.22.202	2012	3	16	17	55	F	0.892883	2	resp_h	0.423963	orig_h	0.314389	minuto	0.183976
192168202102	192.168.28.252	2012	3	16	17	50	F	0.892643	2	resp_h	0.576429	orig_h	0.201229	minuto	0.144545
192168202110	192.168.23.101	2012	3	16	18	44	F	0.892594	2	resp_h	0.505059	orig_h	0.301505	minuto	0.10811
192.168.202.79	192168229101	2012	3	16	18	12	F	0.889164	2	resp_h	0.448398	orig_h	0.350267	minuto	0.115806
192168202103	192.168.22.202	2012	3	16	18	4	F	0.888366	2	resp_h	0.426118	orig_h	0.315987	minuto	0.171036
192168202110	192.168.22.253	2012	3	16	18	37	F	0.88669	2	resp_h	0.528192	orig_h	0.303512	hora	0.084152
192168202110	192.168.23.202	2012	3	16	18	47	F	0.886106	2	resp_h	0.483284	orig_h	0.303712	minuto	0.125754
192168202110	192.168.23.101	2012	3	16	18	42	F	0.885802	2	resp_h	0.508931	orig_h	0.303817	minuto	0.099371
192168202103	192.168.22.202	2012	3	16	17	54	F	0.885243	2	resp_h	0.427622	orig_h	0.317102	minuto	0.176934
192.168.202.79	192168229101	2012	3	16	18	13	F	0.884379	2	resp_h	0.450824	orig_h	0.352162	minuto	0.111016
192168202110	192.168.23.103	2012	3	16	18	44	F	0.884268	2	resp_h	0.498985	orig_h	0.304344	minuto	0.109128
192168202110	192.168.23.101	2012	3	16	18	41	F	0.881559	2	resp_h	0.511381	orig_h	0.305279	minuto	0.095545
192.168.202.90	192.168.201.2	2012	3	16	18	10	F	0.881316	2	orig_h	0.480234	resp_h	0.302831	minuto	0.128715
192168202103	192.168.22.202	2012	3	16	18	5	F	0.88121	2	resp_h	0.429579	orig_h	0.318554	minuto	0.164303
192.168.202.79	192.168.25.202	2012	3	16	17	56	F	0.880537	2	resp_h	0.37188	orig_h	0.353699	minuto	0.195568
192.168.202.79	192168229101	2012	3	16	18	14	F	0.879986	2	resp_h	0.453075	orig_h	0.35392	minuto	0.106463
192168202110	192.168.23.101	2012	3	16	18	40	F	0.877916	2	resp_h	0.513503	orig_h	0.306546	minuto	0.091958
192168202103	192.168.22.202	2012	3	16	17	53	F	0.877899	2	resp_h	0.431199	orig_h	0.319755	minuto	0.170048
192168202110	192.168.22.253	2012	3	16	18	30	F	0.876645	2	resp_h	0.534244	orig_h	0.30699	hora	0.085116
192168202110	192.168.22.253	2012	3	16	18	31	F	0.876559	2	resp_h	0.534297	orig_h	0.30702	hora	0.085125
192.168.202.79	192168229101	2012	3	16	18	15	F	0.875787	2	resp_h	0.455247	orig_h	0.355617	minuto	0.10218
192168202103	192.168.25.202	2012	3	16	17	59	F	0.875304	2	resp_h	0.374103	orig_h	0.320703	minuto	0.225962
192168202110	192.168.23.202	2012	3	16	18	45	F	0.875178	2	resp_h	0.489318	orig_h	0.307505	minuto	0.115611
192168202110	192.168.23.103	2012	3	16	18	42	F	0.874728	2	resp_h	0.504427	orig_h	0.307663	minuto	0.100629
192168202110	192.168.23.101	2012	3	16	18	39	F	0.874714	2	resp_h	0.515383	orig_h	0.307668	minuto	0.088634
192168202103	192.168.22.202	2012	3	16	18	6	F	0.874348	2	resp_h	0.43295	orig_h	0.321053	minuto	0.157745
192168202110	192.168.22.152	2012	3	16	18	30	F	0.873751	2	resp_h	0.513122	orig_h	0.308007	hora	0.085398
192.168.202.79	192.168.25.202	2012	3	16	17	55	F	0.872606	2	resp_h	0.37526	orig_h	0.356914	minuto	0.188251
192168202110	192.168.22.152	2012	3	16	18	37	F	0.87235	2	resp_h	0.513946	orig_h	0.308501	hora	0.085535
192.168.202.79	192168229101	2012	3	16	18	16	F	0.871832	2	resp_h	0.457312	orig_h	0.35723	minuto	0.098167
192168202110	192.168.23.103	2012	3	16	18	41	F	0.87175	2	resp_h	0.50615	orig_h	0.308714	minuto	0.096621
192168202110	192.168.23.101	2012	3	16	18	38	F	0.871716	2	resp_h	0.517155	orig_h	0.308726	minuto	0.085605
192168202103	192.168.22.202	2012	3	16	17	52	F	0.87085	2	resp_h	0.434689	orig_h	0.322343	minuto	0.163331
192168202110	192.168.23.202	2012	3	16	18	44	F	0.870074	2	resp_h	0.492189	orig_h	0.309309	minuto	0.110908
192168202102	192.168.21.103	2012	3	16	17	59	F	0.86905	2	resp_h	0.485891	minuto	0.227588	orig_h	0.206692
192168202103	192.168.25.202	2012	3	16	18	0	F	0.868856	2	resp_h	0.376879	orig_h	0.323083	minuto	0.211229
192.168.202.79	192168229101	2012	3	16	18	17	F	0.868259	2	resp_h	0.459194	orig_h	0.3587	minuto	0.094417
192168202103	192.168.22.202	2012	3	16	18	7	F	0.867783	2	resp_h	0.436226	orig_h	0.323482	minuto	0.151373
192168202110	192.168.23.202	2012	3	16	18	43	F	0.866723	2	resp_h	0.494092	orig_h	0.310505	minuto	0.106277
192168202103	192.168.25.202	2012	3	16	17	58	F	0.866482	2	resp_h	0.377912	orig_h	0.323968	minuto	0.218081
192.168.204.45	192.168.202.78	2012	3	16	18	20	F	0.866042	2	resp_h	0.482093	orig_h	0.344548	hora	0.086158
192168202110	192.168.23.103	2012	3	16	18	39	F	0.865079	2	resp_h	0.510053	orig_h	0.311094	minuto	0.089621
192.168.202.79	192168229101	2012	3	16	18	18	F	0.864894	2	resp_h	0.460981	orig_h	0.360096	minuto	0.090957
192.168.202.79	192.168.25.202	2012	3	16	17	54	F	0.864672	2	resp_h	0.378703	orig_h	0.360188	minuto	0.181143
192168202103	192.168.22.202	2012	3	16	17	51	F	0.864098	2	resp_h	0.438086	orig_h	0.324862	minuto	0.156792
192168202110	192.168.22.152	2012	3	16	18	31	F	0.863949	2	resp_h	0.518944	orig_h	0.311501	hora	0.086367
192168202102	192.168.21.103	2012	3	16	18	0	F	0.862602	2	resp_h	0.489523	minuto	0.21276	orig_h	0.208237
192168202110	192.168.23.202	2012	3	16	18	42	F	0.862571	2	resp_h	0.49647	orig_h	0.311999	minuto	0.102047
192168202110	192.168.23.103	2012	3	16	18	38	F	0.862236	2	resp_h	0.511735	orig_h	0.31212	minuto	0.086546
192168202103	192.168.22.202	2012	3	16	18	8	F	0.861514	2	resp_h	0.4394	orig_h	0.325836	minuto	0.145198
192168202103	192.168.25.202	2012	3	16	18	1	F	0.860516	2	resp_h	0.380532	orig_h	0.326214	minuto	0.203584
192168202102	192.168.21.103	2012	3	16	17	58	F	0.860228	2	resp_h	0.490874	minuto	0.219666	orig_h	0.208812
192168202110	192.168.22.202	2012	3	16	18	30	F	0.859389	2	resp_h	0.440486	orig_h	0.313154	hora	0.086825
192168202103	192.168.22.202	2012	3	16	18	49	F	0.85929	2	resp_h	0.440537	orig_h	0.32668	minuto	0.142985
192168202110	192.168.23.202	2012	3	16	18	41	F	0.858839	2	resp_h	0.498628	orig_h	0.313355	minuto	0.098073
192.168.202.79	192.168.21.253	2012	3	16	17	57	F	0.858107	2	orig_h	0.362944	resp_h	0.345857	minuto	0.210272
192168202103	192.168.25.202	2012	3	16	17	57	F	0.857955	2	resp_h	0.381668	orig_h	0.327188	minuto	0.21031
192.168.202.79	192168229101	2012	3	16	18	21	F	0.857877	2	resp_h	0.464751	orig_h	0.363041	hora	0.086978
192168202103	192.168.22.202	2012	3	16	17	50	F	0.857641	2	resp_h	0.441384	orig_h	0.327308	minuto	0.150444
192168202110	192.168.22.152	2012	3	16	18	32	F	0.857591	2	resp_h	0.522792	orig_h	0.313811	hora	0.087007
192168202110	192.168.22.152	2012	3	16	18	27	F	0.85685	2	resp_h	0.523243	orig_h	0.314082	hora	0.087083
192168202110	192.168.22.152	2012	3	16	18	28	F	0.856562	2	resp_h	0.52342	orig_h	0.314188	hora	0.087112
192168202103	192.168.22.202	2012	3	16	18	9	F	0.85554	2	resp_h	0.442468	orig_h	0.328111	minuto	0.139229
192168202110	192.168.22.152	2012	3	16	18	29	F	0.855409	2	resp_h	0.524125	orig_h	0.314611	hora	0.087229
192168202102	192.168.21.103	2012	3	16	18	1	F	0.854262	2	resp_h	0.494302	orig_h	0.21027	minuto	0.205075
192168202103	192.168.22.202	2012	3	16	18	48	F	0.853425	2	resp_h	0.443565	orig_h	0.328925	minuto	0.137095
192168202103	192.168.25.202	2012	3	16	18	2	F	0.852472	2	resp_h	0.384123	orig_h	0.329292	minuto	0.196069
192168202102	192.168.21.103	2012	3	16	17	57	F	0.851731	2	resp_h	0.495771	minuto	0.211846	orig_h	0.210895
192168202110	192.168.21.103	2012	3	16	18	29	F	0.851117	2	resp_h	0.496129	orig_h	0.316198	hora	0.087669
192.168.202.87	192.168.201.2	2012	3	16	18	17	F	0.850896	2	orig_h	0.499723	resp_h	0.313657	minuto	0.096344
192168202103	192.168.22.202	2012	3	16	18	10	F	0.849862	2	resp_h	0.445424	orig_h	0.330303	minuto	0.133478
192.168.202.79	192.168.21.253	2012	3	16	17	56	F	0.849774	2	orig_h	0.366503	resp_h	0.349249	minuto	0.202648
192168202103	192.168.25.202	2012	3	16	17	56	F	0.849723	2	resp_h	0.385365	orig_h	0.330357	minuto	0.20266
192168202103	192.168.22.202	2012	3	16	18	47	F	0.847855	2	resp_h	0.446479	orig_h	0.331085	minuto	0.131427
192168202102	192.168.21.103	2012	3	16	18	2	F	0.846218	2	resp_h	0.499001	orig_h	0.212269	minuto	0.197518
192168202103	192.168.25.202	2012	3	16	18	3	F	0.844724	2	resp_h	0.387646	orig_h	0.332313	minuto	0.188695
192168202103	192.168.22.202	2012	3	16	18	11	F	0.84448	2	resp_h	0.448263	orig_h	0.332408	minuto	0.127956
192168202102	192.168.21.103	2012	3	16	17	56	F	0.843439	2	resp_h	0.500645	orig_h	0.212968	minuto	0.20417
192168202103	192.168.22.202	2012	3	16	18	46	F	0.842582	2	resp_h	0.449273	orig_h	0.333157	minuto	0.125991
192.168.202.79	192.168.21.253	2012	3	16	17	55	F	0.841878	2	orig_h	0.36994	resp_h	0.352524	minuto	0.195122
192168202103	192.168.25.202	2012	3	16	17	55	F	0.841788	2	resp_h	0.388998	orig_h	0.333472	minuto	0.195143
192168202103	192.168.22.202	2012	3	16	18	12	F	0.839394	2	resp_h	0.450979	orig_h	0.334423	minuto	0.122672
192168202102	192168229101	2012	3	16	18	0	F	0.839107	2	resp_h	0.475147	minuto	0.218717	orig_h	0.214067
192168202102	192.168.21.103	2012	3	16	18	3	F	0.83847	2	resp_h	0.503612	orig_h	0.21423	minuto	0.190102
192168202103	192.168.22.202	2012	3	16	18	45	F	0.837604	2	resp_h	0.451943	orig_h	0.335137	minuto	0.120797
192168202112	192.168.201.2	2012	3	16	18	46	F	0.837279	2	orig_h	0.462761	resp_h	0.318759	minuto	0.126789
192168202103	192.168.25.202	2012	3	16	18	4	F	0.837271	2	resp_h	0.391097	orig_h	0.335271	minuto	0.181473
192168202110	192.168.21.103	2012	3	16	18	28	F	0.836288	2	resp_h	0.504926	orig_h	0.321805	hora	0.089224
192168202102	192.168.21.103	2012	3	16	17	55	F	0.835564	2	resp_h	0.505363	orig_h	0.214975	minuto	0.196597
192168202103	192.168.22.202	2012	3	16	18	13	F	0.834604	2	resp_h	0.453567	orig_h	0.336342	minuto	0.117637
192168202103	192.168.25.202	2012	3	16	17	54	F	0.834148	2	resp_h	0.392561	orig_h	0.336526	minuto	0.187771
192.168.202.79	192.168.21.253	2012	3	16	17	54	F	0.833599	2	orig_h	0.373615	resp_h	0.356026	minuto	0.187895
192168202112	192.168.201.2	2012	3	16	18	45	F	0.833027	2	orig_h	0.465124	resp_h	0.320386	minuto	0.121461
192168202103	192.168.22.202	2012	3	16	18	44	F	0.832922	2	resp_h	0.454483	orig_h	0.337021	minuto	0.115855
192168202110	192.168.21.103	2012	3	16	18	26	F	0.831388	2	resp_h	0.507902	orig_h	0.323701	hora	0.08975
192168202110	192.168.21.103	2012	3	16	18	32	F	0.831295	2	resp_h	0.507959	orig_h	0.323738	hora	0.08976
192168202102	192.168.21.103	2012	3	16	18	4	F	0.831048	2	resp_h	0.50811	orig_h	0.216144	minuto	0.182832
192168202110	192.168.21.103	2012	3	16	18	27	F	0.830834	2	resp_h	0.50824	orig_h	0.323917	hora	0.089809
192168202110	192.168.21.103	2012	3	16	18	31	F	0.830729	2	resp_h	0.508305	orig_h	0.323958	hora	0.089821
192168202110	192.168.21.103	2012	3	16	18	30	F	0.830485	2	resp_h	0.508454	orig_h	0.324053	hora	0.089847
192168202103	192.168.25.202	2012	3	16	18	5	F	0.830114	2	resp_h	0.394468	orig_h	0.338161	minuto	0.174416
192168202103	192.168.22.202	2012	3	16	18	14	F	0.83011	2	resp_h	0.456023	orig_h	0.338163	minuto	0.11286
192168202102	192.168.23.202	2012	3	16	18	9	F	0.829095	2	resp_h	0.516516	orig_h	0.216653	minuto	0.14367
192168202103	192.168.22.202	2012	3	16	18	43	F	0.828537	2	resp_h	0.456889	orig_h	0.338805	minuto	0.111175
192168202112	192.168.201.2	2012	3	16	18	44	F	0.828345	2	orig_h	0.467753	resp_h	0.322197	minuto	0.116496
192168202102	192.168.21.103	2012	3	16	17	54	F	0.827863	2	resp_h	0.510064	orig_h	0.216975	minuto	0.189197
192168202103	192.168.25.202	2012	3	16	17	53	F	0.826804	2	resp_h	0.396048	orig_h	0.339515	minuto	0.180557
192168202103	192.168.22.202	2012	3	16	18	15	F	0.825911	2	resp_h	0.458341	orig_h	0.339882	minuto	0.10835
192168202103	192.168.22.202	2012	3	16	18	42	F	0.824447	2	resp_h	0.459155	orig_h	0.340486	minuto	0.106766
192168202102	192.168.21.103	2012	3	16	18	5	F	0.82383	2	resp_h	0.512561	orig_h	0.218037	minuto	0.175747
192168202103	192.168.25.202	2012	3	16	18	6	F	0.823253	2	resp_h	0.397756	orig_h	0.340979	minuto	0.167536
192168202102	192.168.23.101	2012	3	16	17	49	F	0.822747	2	resp_h	0.547936	orig_h	0.218324	minuto	0.149336
192168202103	192.168.22.202	2012	3	16	18	16	F	0.822009	2	resp_h	0.460517	orig_h	0.341495	minuto	0.104117
192168202103	192.168.22.202	2012	3	16	18	41	F	0.820653	2	resp_h	0.461278	orig_h	0.34206	minuto	0.102637
192168202102	192.168.21.103	2012	3	16	17	53	F	0.82058	2	resp_h	0.514591	orig_h	0.218901	minuto	0.181926
192168202102	192168229101	2012	3	16	17	56	F	0.819975	2	resp_h	0.486234	orig_h	0.219062	minuto	0.210012
192168202103	192.168.25.202	2012	3	16	17	52	F	0.819755	2	resp_h	0.399453	orig_h	0.342434	minuto	0.173511
192168202102	192.168.23.202	2012	3	16	17	52	F	0.819225	2	resp_h	0.522739	orig_h	0.219263	minuto	0.173623
192.168.202.76	192168229101	2012	3	16	18	18	F	0.818591	2	resp_h	0.487056	orig_h	0.322776	minuto	0.096102
192168202103	192.168.22.202	2012	3	16	18	17	F	0.818403	2	resp_h	0.462546	orig_h	0.343	minuto	0.100169
192168202103	192.168.22.202	2012	3	16	18	40	F	0.817155	2	resp_h	0.463253	orig_h	0.343524	minuto	0.098795
192168202102	192.168.21.103	2012	3	16	18	6	F	0.81703	2	resp_h	0.516827	orig_h	0.219852	minuto	0.168812
192168202103	192.168.25.202	2012	3	16	18	7	F	0.816688	2	resp_h	0.400954	orig_h	0.343721	minuto	0.160844
192168202103	192.168.22.202	2012	3	16	18	18	F	0.815092	2	resp_h	0.464425	orig_h	0.344393	minuto	0.096515
192168202102	192168229101	2012	3	16	18	3	F	0.814912	2	resp_h	0.489254	orig_h	0.220423	minuto	0.195598
192168202103	192.168.22.202	2012	3	16	18	39	F	0.813953	2	resp_h	0.465075	orig_h	0.344875	minuto	0.09525
192168202102	192.168.21.103	2012	3	16	17	52	F	0.813471	2	resp_h	0.519089	orig_h	0.220814	minuto	0.174851
192168202103	192.168.25.202	2012	3	16	17	51	F	0.813002	2	resp_h	0.402771	orig_h	0.345279	minuto	0.166646
192168202103	192.168.22.202	2012	3	16	18	19	F	0.812078	2	resp_h	0.466149	orig_h	0.345672	minuto	0.093161
192168202103	192.168.22.202	2012	3	16	18	38	F	0.811047	2	resp_h	0.466741	orig_h	0.346111	minuto	0.092008
192168202103	192.168.25.202	2012	3	16	18	8	F	0.810418	2	resp_h	0.404055	orig_h	0.34638	minuto	0.154352
192168202102	192.168.21.103	2012	3	16	18	7	F	0.810403	2	resp_h	0.521053	orig_h	0.22165	minuto	0.162091
192168202103	192.168.22.202	2012	3	16	18	20	F	0.809359	2	resp_h	0.467715	orig_h	0.346833	hora	0.092192
192168202103	192.168.22.202	2012	3	16	18	37	F	0.808437	2	resp_h	0.468248	orig_h	0.347228	hora	0.092298
192168202103	192.168.25.202	2012	3	16	18	49	F	0.808195	2	resp_h	0.405167	orig_h	0.347333	minuto	0.152025
192168202102	192168229101	2012	3	16	18	17	F	0.808059	2	resp_h	0.493404	orig_h	0.222293	minuto	0.101451
192168202103	192.168.22.202	2012	3	16	18	21	F	0.806937	2	resp_h	0.469119	orig_h	0.347874	hora	0.092469
192168202102	192.168.21.103	2012	3	16	17	51	F	0.806779	2	resp_h	0.523394	orig_h	0.222645	minuto	0.167932
192168202103	192.168.25.202	2012	3	16	17	50	F	0.806546	2	resp_h	0.405996	orig_h	0.348043	minuto	0.159975
192168202103	192.168.22.202	2012	3	16	18	36	F	0.806123	2	resp_h	0.469592	orig_h	0.348225	hora	0.092563
192168202112	192.168.201.2	2012	3	16	18	38	F	0.806061	2	orig_h	0.480684	resp_h	0.331104	minuto	0.092578
192168202103	192.168.22.202	2012	3	16	18	22	F	0.80481	2	resp_h	0.470358	orig_h	0.348793	hora	0.092713
192168202103	192.168.25.202	2012	3	16	18	9	F	0.804445	2	resp_h	0.407056	orig_h	0.348952	minuto	0.148072
192168202102	192.168.21.103	2012	3	16	18	8	F	0.804195	2	resp_h	0.525076	orig_h	0.223361	minuto	0.155546
192168202103	192.168.22.202	2012	3	16	18	35	F	0.804105	2	resp_h	0.470771	orig_h	0.349099	hora	0.092795
192168202103	192.168.22.202	2012	3	16	18	23	F	0.80298	2	resp_h	0.47143	orig_h	0.349588	hora	0.092925
192168202103	192.168.22.202	2012	3	16	18	34	F	0.802383	2	resp_h	0.471781	orig_h	0.349848	hora	0.092994
192168202103	192.168.25.202	2012	3	16	18	48	F	0.802329	2	resp_h	0.408129	orig_h	0.349872	minuto	0.145826
192168202103	192.168.22.202	2012	3	16	18	24	F	0.801446	2	resp_h	0.472333	orig_h	0.350258	hora	0.093103
192168202103	192.168.22.202	2012	3	16	18	33	F	0.800957	2	resp_h	0.472621	orig_h	0.350471	hora	0.093159
192168202103	192.168.25.202	2012	3	16	17	49	F	0.800384	2	resp_h	0.409121	orig_h	0.350722	minuto	0.153509
192168202102	192.168.21.103	2012	3	16	17	50	F	0.800291	2	resp_h	0.527637	orig_h	0.22445	minuto	0.161225
192168202103	192.168.22.202	2012	3	16	18	25	F	0.800207	2	resp_h	0.473064	orig_h	0.3508	hora	0.093247
192168202103	192.168.22.202	2012	3	16	18	32	F	0.799827	2	resp_h	0.473288	orig_h	0.350966	hora	0.093291
192168202103	192.168.22.202	2012	3	16	18	26	F	0.799265	2	resp_h	0.473622	orig_h	0.351213	hora	0.093357
192168202103	192.168.22.202	2012	3	16	18	31	F	0.798994	2	resp_h	0.473782	orig_h	0.351332	hora	0.093388
192168202103	192.168.25.202	2012	3	16	18	10	F	0.798767	2	resp_h	0.409949	orig_h	0.351432	minuto	0.142017
192168202103	192.168.22.202	2012	3	16	18	27	F	0.798619	2	resp_h	0.474005	orig_h	0.351497	hora	0.093432
192168202103	192.168.22.202	2012	3	16	18	30	F	0.798456	2	resp_h	0.474102	orig_h	0.351569	hora	0.093451
192168202103	192.168.22.202	2012	3	16	18	28	F	0.798268	2	resp_h	0.474213	orig_h	0.351652	hora	0.093473
192168202103	192.168.22.202	2012	3	16	18	29	F	0.798214	2	resp_h	0.474245	orig_h	0.351676	hora	0.09348
192168202102	192.168.21.103	2012	3	16	18	9	F	0.79816	2	resp_h	0.529046	orig_h	0.22505	minuto	0.149238
192168202102	192.168.23.202	2012	3	16	18	10	F	0.797338	2	resp_h	0.537088	orig_h	0.225281	minuto	0.142271
192168202102	192168229101	2012	3	16	17	53	F	0.796927	2	resp_h	0.500296	orig_h	0.225398	minuto	0.187326
192168202103	192.168.25.202	2012	3	16	18	47	F	0.79676	2	resp_h	0.410982	orig_h	0.352317	minuto	0.139855
192168202112	192.168.201.2	2012	3	16	18	27	F	0.794254	2	orig_h	0.487829	resp_h	0.336026	hora	0.093946
192168202102	192.168.21.103	2012	3	16	17	49	F	0.79413	2	resp_h	0.531731	orig_h	0.226192	minuto	0.154717
192168202102	192168229101	2012	3	16	18	6	F	0.793505	2	resp_h	0.502454	orig_h	0.22637	minuto	0.173817
192168202103	192.168.25.202	2012	3	16	18	11	F	0.793385	2	resp_h	0.41273	orig_h	0.353816	minuto	0.136197
192168202112	192.168.201.2	2012	3	16	18	28	F	0.793021	2	orig_h	0.488588	resp_h	0.336549	hora	0.094092
192168202102	192.168.23.202	2012	3	16	18	11	F	0.79265	2	resp_h	0.540265	orig_h	0.226614	minuto	0.136323
192168202102	192.168.21.103	2012	3	16	18	10	F	0.792543	2	resp_h	0.532795	orig_h	0.226644	minuto	0.143132
192168202103	192.168.25.202	2012	3	16	18	46	F	0.791486	2	resp_h	0.41372	orig_h	0.354665	minuto	0.134125
192168202110	192.168.22.202	2012	3	16	18	34	F	0.790878	2	resp_h	0.478644	orig_h	0.340282	hora	0.094347
192168202102	192168229101	2012	3	16	18	12	F	0.790486	2	resp_h	0.504373	orig_h	0.227234	minuto	0.130262
192168202110	192.168.22.202	2012	3	16	18	32	F	0.788419	2	resp_h	0.480137	orig_h	0.341343	hora	0.094641
192168202103	192.168.25.202	2012	3	16	18	12	F	0.788299	2	resp_h	0.415393	orig_h	0.356099	minuto	0.130623
192168202102	192.168.23.202	2012	3	16	18	12	F	0.78809	2	resp_h	0.543391	orig_h	0.227925	minuto	0.130658
192168202102	192.168.21.103	2012	3	16	18	11	F	0.786763	2	resp_h	0.53671	orig_h	0.22831	minuto	0.137343
192168202110	192.168.22.202	2012	3	16	18	29	F	0.786616	2	resp_h	0.481238	orig_h	0.342125	hora	0.094858
192168202103	192.168.25.202	2012	3	16	18	45	F	0.786509	2	resp_h	0.416338	orig_h	0.356909	minuto	0.128645
192168202103	192.168.25.202	2012	3	16	18	13	F	0.783509	2	resp_h	0.417933	orig_h	0.358276	minuto	0.125308
192168202103	192.168.25.202	2012	3	16	18	44	F	0.781827	2	resp_h	0.418832	orig_h	0.359047	minuto	0.123427
192168202102	192.168.21.103	2012	3	16	18	12	F	0.781423	2	resp_h	0.540378	orig_h	0.22987	minuto	0.131773
192168202103	192.168.25.202	2012	3	16	18	14	F	0.779014	2	resp_h	0.420344	orig_h	0.360343	minuto	0.120262
192168202103	192.168.25.202	2012	3	16	18	43	F	0.777441	2	resp_h	0.421194	orig_h	0.361072	minuto	0.118482
192168202102	192.168.21.103	2012	3	16	18	13	F	0.777123	2	resp_h	0.543367	orig_h	0.231142	minuto	0.126338
192168202102	192168229101	2012	3	16	17	50	F	0.776797	2	resp_h	0.513261	orig_h	0.231239	minuto	0.166101
192168202103	192.168.25.202	2012	3	16	18	15	F	0.774816	2	resp_h	0.422621	orig_h	0.362295	minuto	0.115495
192168202102	192168229101	2012	3	16	18	9	F	0.774696	2	resp_h	0.514653	orig_h	0.231866	minuto	0.153758
192168202103	192.168.25.202	2012	3	16	18	42	F	0.773352	2	resp_h	0.423422	orig_h	0.362982	minuto	0.11382
192168202102	192.168.21.103	2012	3	16	18	16	F	0.77166	2	resp_h	0.547214	orig_h	0.232778	minuto	0.11091
192168202103	192.168.25.202	2012	3	16	18	16	F	0.770914	2	resp_h	0.424761	orig_h	0.364129	minuto	0.111018
192168202103	192.168.25.202	2012	3	16	18	41	F	0.769558	2	resp_h	0.425509	orig_h	0.364771	minuto	0.109451
192168202102	192.168.21.103	2012	3	16	18	17	F	0.768159	2	resp_h	0.549709	orig_h	0.233839	minuto	0.106721
192168202103	192.168.25.202	2012	3	16	18	17	F	0.767307	2	resp_h	0.426757	orig_h	0.365841	minuto	0.10684
192168202110	192168229156	2012	3	16	17	59	F	0.76706	2	orig_h	0.350848	resp_h	0.301167	minuto	0.257849
192168202103	192.168.25.202	2012	3	16	18	40	F	0.76606	2	resp_h	0.427452	orig_h	0.366437	minuto	0.105385
192168202103	192.168.25.202	2012	3	16	18	18	F	0.763997	2	resp_h	0.428606	orig_h	0.367426	minuto	0.102969
192168202103	192.168.25.202	2012	3	16	18	39	F	0.762858	2	resp_h	0.429246	orig_h	0.367975	minuto	0.10163
192.168.202.76	192168229156	2012	3	16	17	59	F	0.762185	2	orig_h	0.346663	resp_h	0.303093	minuto	0.259498
192168202102	192168229101	2012	3	16	18	16	F	0.761445	2	resp_h	0.523609	orig_h	0.235901	minuto	0.112398
192168202103	192.168.25.202	2012	3	16	18	19	F	0.760983	2	resp_h	0.430304	orig_h	0.368882	minuto	0.099416
192168202110	192168229156	2012	3	16	18	0	F	0.76061	2	orig_h	0.353823	resp_h	0.303721	minuto	0.241289
192168202103	192.168.25.202	2012	3	16	18	38	F	0.759952	2	resp_h	0.430888	orig_h	0.369382	minuto	0.098195
192168202102	192.168.21.103	2012	3	16	18	20	F	0.759419	2	resp_h	0.556034	orig_h	0.23653	hora	0.098255
192168202110	192168229156	2012	3	16	17	58	F	0.758553	2	orig_h	0.354783	resp_h	0.304544	minuto	0.24911
192168202103	192.168.25.202	2012	3	16	18	20	F	0.758264	2	resp_h	0.431847	orig_h	0.370204	hora	0.098405
192168202103	192.168.25.202	2012	3	16	18	37	F	0.757342	2	resp_h	0.432373	orig_h	0.370655	hora	0.098525
192168202103	192.168.25.202	2012	3	16	18	21	F	0.755842	2	resp_h	0.433231	orig_h	0.37139	hora	0.09872
192.168.202.76	192168229156	2012	3	16	18	0	F	0.755765	2	orig_h	0.349608	resp_h	0.305668	minuto	0.242836
192168202103	192.168.25.202	2012	3	16	18	36	F	0.755028	2	resp_h	0.433698	orig_h	0.371791	hora	0.098827
192168202102	192.168.21.103	2012	3	16	18	19	F	0.754729	2	resp_h	0.55949	orig_h	0.238	minuto	0.10024
192168202102	192.168.21.103	2012	3	16	18	21	F	0.754664	2	resp_h	0.559538	orig_h	0.238021	hora	0.098874
192168202103	192.168.25.202	2012	3	16	18	22	F	0.753715	2	resp_h	0.434453	orig_h	0.372438	hora	0.098999
192.168.202.76	192168229156	2012	3	16	17	58	F	0.753391	2	orig_h	0.35071	resp_h	0.306631	minuto	0.250817
192168202103	192.168.25.202	2012	3	16	18	35	F	0.75301	2	resp_h	0.43486	orig_h	0.372787	hora	0.099091
192168202110	192168229156	2012	3	16	18	1	F	0.752508	2	orig_h	0.357632	resp_h	0.306991	minuto	0.232805
192168202103	192.168.25.202	2012	3	16	18	23	F	0.751885	2	resp_h	0.435511	orig_h	0.373345	hora	0.09924
192168202103	192.168.25.202	2012	3	16	18	34	F	0.751288	2	resp_h	0.435857	orig_h	0.373642	hora	0.099318
192168202103	192.168.25.202	2012	3	16	18	24	F	0.75035	2	resp_h	0.436401	orig_h	0.374108	hora	0.099443
192168202110	192168229156	2012	3	16	17	57	F	0.750008	2	orig_h	0.358825	resp_h	0.308014	minuto	0.240579
192168202103	192.168.25.202	2012	3	16	18	33	F	0.749862	2	resp_h	0.436685	orig_h	0.374352	hora	0.099507
192168202103	192.168.25.202	2012	3	16	18	25	F	0.749112	2	resp_h	0.437123	orig_h	0.374727	hora	0.099607
192168202103	192.168.25.202	2012	3	16	18	32	F	0.748732	2	resp_h	0.437344	orig_h	0.374917	hora	0.099657
192168202103	192.168.25.202	2012	3	16	18	26	F	0.74817	2	resp_h	0.437673	orig_h	0.375199	hora	0.099732
192168202103	192.168.25.202	2012	3	16	18	31	F	0.747898	2	resp_h	0.437832	orig_h	0.375335	hora	0.099769
192168202103	192.168.25.202	2012	3	16	18	27	F	0.747523	2	resp_h	0.438052	orig_h	0.375523	hora	0.099819
192.168.202.76	192168229156	2012	3	16	18	1	F	0.747397	2	orig_h	0.353522	resp_h	0.30909	minuto	0.234397
192168202103	192.168.25.202	2012	3	16	18	30	F	0.747361	2	resp_h	0.438147	orig_h	0.375605	hora	0.09984
192168202103	192.168.25.202	2012	3	16	18	28	F	0.747173	2	resp_h	0.438257	orig_h	0.375699	hora	0.099865
192168202103	192.168.25.202	2012	3	16	18	29	F	0.747119	2	resp_h	0.438289	orig_h	0.375727	hora	0.099873
192.168.202.76	192168229156	2012	3	16	17	57	F	0.744836	2	orig_h	0.354738	resp_h	0.310153	minuto	0.24225
192168202110	192168229156	2012	3	16	18	2	F	0.743685	2	orig_h	0.361875	resp_h	0.310633	minuto	0.22475
192168202110	192168229156	2012	3	16	17	56	F	0.741372	2	orig_h	0.363005	resp_h	0.311602	minuto	0.232279
192.168.202.76	192168229156	2012	3	16	18	2	F	0.739381	2	orig_h	0.357355	resp_h	0.312441	minuto	0.226059
192.168.202.76	192168229156	2012	3	16	17	56	F	0.736632	2	orig_h	0.358688	resp_h	0.313607	minuto	0.233773
192168202110	192168229156	2012	3	16	18	3	F	0.736272	2	orig_h	0.365519	resp_h	0.31376	minuto	0.216489
192168202110	192168229156	2012	3	16	17	55	F	0.733506	2	orig_h	0.366897	resp_h	0.314943	minuto	0.223951
192.168.202.76	192168229156	2012	3	16	18	3	F	0.731605	2	orig_h	0.361153	resp_h	0.315762	minuto	0.217871
192168202102	192168229101	2012	3	16	18	19	F	0.730635	2	resp_h	0.545689	orig_h	0.245849	minuto	0.103545
192.168.202.76	192168229156	2012	3	16	17	55	F	0.728669	2	orig_h	0.362608	resp_h	0.317034	minuto	0.225437
192168202110	192168229156	2012	3	16	17	54	F	0.726365	2	orig_h	0.370504	resp_h	0.318039	minuto	0.215634
192.168.202.76	192168229156	2012	3	16	18	4	F	0.72418	2	orig_h	0.364856	resp_h	0.318999	minuto	0.209813
192168202110	192.168.21.253	2012	3	16	18	34	F	0.723217	2	resp_h	0.410365	orig_h	0.372117	hora	0.103173
192.168.202.76	192168229156	2012	3	16	17	54	F	0.721057	2	orig_h	0.366436	resp_h	0.320381	minuto	0.217222
192168202110	192168229156	2012	3	16	17	53	F	0.718835	2	orig_h	0.374385	resp_h	0.321371	minuto	0.207676
192.168.202.76	192168229156	2012	3	16	18	5	F	0.717023	2	orig_h	0.368498	resp_h	0.322183	minuto	0.201926
192.168.202.76	192168229156	2012	3	16	17	53	F	0.713684	2	orig_h	0.370222	resp_h	0.32369	minuto	0.209175
192168202110	192168229156	2012	3	16	17	52	F	0.711233	2	orig_h	0.378387	resp_h	0.324806	minuto	0.199986
192168202110	192.168.21.253	2012	3	16	18	35	F	0.710798	2	resp_h	0.417535	orig_h	0.378619	hora	0.104976
192.168.202.76	192168229156	2012	3	16	18	6	F	0.710162	2	orig_h	0.372058	resp_h	0.325296	minuto	0.194216
192.168.202.79	192168229156	2012	3	16	18	15	F	0.709196	2	orig_h	0.439152	resp_h	0.325739	minuto	0.126182
192168202110	192.168.21.253	2012	3	16	18	32	F	0.708136	2	resp_h	0.419104	orig_h	0.380042	hora	0.105371
192.168.202.76	192168229156	2012	3	16	17	52	F	0.706664	2	orig_h	0.3739	resp_h	0.326906	minuto	0.201279
192168202110	192.168.21.253	2012	3	16	18	30	F	0.704969	2	resp_h	0.420987	orig_h	0.381749	hora	0.105844
192168202110	192168229156	2012	3	16	17	51	F	0.704929	2	orig_h	0.381771	resp_h	0.327711	minuto	0.192195
192168202110	192.168.21.253	2012	3	16	18	31	F	0.704532	2	resp_h	0.421248	orig_h	0.381986	hora	0.10591
192.168.202.76	192168229156	2012	3	16	18	7	F	0.703569	2	orig_h	0.375545	resp_h	0.328344	minuto	0.186704
192.168.202.76	192168229156	2012	3	16	17	51	F	0.699911	2	orig_h	0.377507	resp_h	0.33006	minuto	0.193573
192.168.202.79	192168229156	2012	3	16	18	18	F	0.698006	2	orig_h	0.446192	resp_h	0.330961	minuto	0.112704
192.168.202.76	192168229156	2012	3	16	18	8	F	0.697327	2	orig_h	0.378906	resp_h	0.331283	minuto	0.179384
192.168.202.76	192168229156	2012	3	16	18	49	F	0.695103	2	orig_h	0.380118	resp_h	0.332343	minuto	0.176759
192.168.202.76	192168229156	2012	3	16	17	50	F	0.693454	2	orig_h	0.381022	resp_h	0.333133	minuto	0.186064
192168202110	192168229156	2012	3	16	17	49	F	0.692256	2	orig_h	0.38876	resp_h	0.33371	minuto	0.177486
192.168.202.76	192168229156	2012	3	16	18	9	F	0.691326	2	orig_h	0.382195	resp_h	0.334159	minuto	0.172301
192.168.202.76	192168229156	2012	3	16	18	48	F	0.68921	2	orig_h	0.383368	resp_h	0.335185	minuto	0.16976
192.168.202.76	192168229156	2012	3	16	17	49	F	0.687265	2	orig_h	0.384453	resp_h	0.336133	minuto	0.178775
192.168.202.76	192168229156	2012	3	16	18	10	F	0.685676	2	orig_h	0.385345	resp_h	0.336913	minuto	0.16544
192.168.202.76	192.168.201.2	2012	3	16	18	19	F	0.684325	2	resp_h	0.390005	orig_h	0.386105	minuto	0.110553
192.168.202.76	192168229156	2012	3	16	18	47	F	0.683669	2	orig_h	0.386476	resp_h	0.337902	minuto	0.16299
192168202110	192168229156	2012	3	16	18	46	F	0.682919	2	orig_h	0.394075	resp_h	0.338272	minuto	0.155447
192.168.202.76	192.168.201.2	2012	3	16	18	20	F	0.680924	2	resp_h	0.391953	orig_h	0.388034	hora	0.109582
192.168.202.76	192168229156	2012	3	16	18	11	F	0.680266	2	orig_h	0.388409	resp_h	0.339592	minuto	0.158844
192.168.202.76	192168229156	2012	3	16	18	46	F	0.678367	2	orig_h	0.389496	resp_h	0.340542	minuto	0.15649
192168202110	192168229156	2012	3	16	18	45	F	0.678318	2	orig_h	0.396748	resp_h	0.340567	minuto	0.149163
192.168.202.76	192.168.201.2	2012	3	16	18	23	F	0.675453	2	resp_h	0.395127	orig_h	0.391177	hora	0.110469
192.168.202.76	192168229156	2012	3	16	18	12	F	0.675208	2	orig_h	0.391319	resp_h	0.342136	minuto	0.152502
192168202110	192168229156	2012	3	16	18	44	F	0.673608	2	orig_h	0.399522	resp_h	0.342949	minuto	0.143256
192.168.202.76	192168229156	2012	3	16	18	45	F	0.673418	2	orig_h	0.392359	resp_h	0.343045	minuto	0.150249
192.168.202.76	192.168.201.2	2012	3	16	18	26	F	0.671539	2	resp_h	0.39743	orig_h	0.393457	hora	0.111113
192.168.202.76	192168229156	2012	3	16	18	13	F	0.67039	2	orig_h	0.394131	resp_h	0.344595	minuto	0.146452
192168202110	192168229156	2012	3	16	18	43	F	0.66925	2	orig_h	0.402124	resp_h	0.345182	minuto	0.137636
192.168.202.76	192168229156	2012	3	16	18	44	F	0.668708	2	orig_h	0.395122	resp_h	0.345461	minuto	0.144306
192.168.202.76	192168229156	2012	3	16	18	14	F	0.665923	2	orig_h	0.396775	resp_h	0.346906	minuto	0.140686
192168202110	192168229156	2012	3	16	18	42	F	0.66516	2	orig_h	0.404596	resp_h	0.347304	minuto	0.132333
192.168.202.76	192168229156	2012	3	16	18	43	F	0.66435	2	orig_h	0.397714	resp_h	0.347728	minuto	0.138651
192.168.202.76	192168229156	2012	3	16	18	15	F	0.661697	2	orig_h	0.399309	resp_h	0.349122	minuto	0.135239
192168202110	192168229156	2012	3	16	18	41	F	0.661366	2	orig_h	0.406917	resp_h	0.349296	minuto	0.127356
192.168.202.76	192168229156	2012	3	16	18	42	F	0.660232	2	orig_h	0.400195	resp_h	0.349896	minuto	0.133321
192168202110	192168229156	2012	3	16	18	40	F	0.65784	2	orig_h	0.409098	resp_h	0.351169	minuto	0.122721
192.168.202.76	192168229156	2012	3	16	18	16	F	0.657823	2	orig_h	0.401661	resp_h	0.351178	minuto	0.130104
192.168.202.76	192168229156	2012	3	16	18	41	F	0.656467	2	orig_h	0.40249	resp_h	0.351904	minuto	0.128307
192168202110	192168229156	2012	3	16	18	39	F	0.654666	2	orig_h	0.411081	resp_h	0.352871	minuto	0.118425
192.168.202.76	192168229156	2012	3	16	18	17	F	0.654188	2	orig_h	0.403892	resp_h	0.353129	minuto	0.125314
192.168.202.76	192168229156	2012	3	16	18	40	F	0.652941	2	orig_h	0.404664	resp_h	0.353804	minuto	0.123642
192168202110	192168229156	2012	3	16	18	38	F	0.651733	2	orig_h	0.412932	resp_h	0.35446	minuto	0.1145
192.168.202.76	192168229156	2012	3	16	18	18	F	0.650621	2	orig_h	0.406107	resp_h	0.355065	minuto	0.120913
192.168.202.76	192168229156	2012	3	16	18	39	F	0.649767	2	orig_h	0.40664	resp_h	0.355532	minuto	0.119318
192168202110	192168229156	2012	3	16	18	37	F	0.649151	2	orig_h	0.414574	resp_h	0.355869	hora	0.114945
192.168.202.76	192168229156	2012	3	16	18	19	F	0.647891	2	orig_h	0.407817	resp_h	0.356561	minuto	0.116769
192.168.202.76	192168229156	2012	3	16	18	38	F	0.646833	2	orig_h	0.408485	resp_h	0.357145	minuto	0.115367
192168202110	192168229156	2012	3	16	18	36	F	0.646809	2	orig_h	0.416076	resp_h	0.357158	hora	0.115361
192.168.202.76	192168229156	2012	3	16	18	20	F	0.645145	2	orig_h	0.409554	resp_h	0.358079	hora	0.115659
192168202110	192168229156	2012	3	16	18	35	F	0.644819	2	orig_h	0.41736	resp_h	0.35826	hora	0.115717
192.168.202.76	192168229156	2012	3	16	18	37	F	0.644251	2	orig_h	0.410122	resp_h	0.358576	hora	0.115819
192168202110	192168229156	2012	3	16	18	34	F	0.643069	2	orig_h	0.418495	resp_h	0.359235	hora	0.116032
192.168.202.76	192168229156	2012	3	16	18	21	F	0.642779	2	orig_h	0.411061	resp_h	0.359397	hora	0.116085
192.168.202.76	192168229156	2012	3	16	18	36	F	0.641909	2	orig_h	0.411618	resp_h	0.359884	hora	0.116242
192168202110	192168229156	2012	3	16	18	33	F	0.641671	2	orig_h	0.419407	resp_h	0.360018	hora	0.116285
192.168.202.76	192168229156	2012	3	16	18	22	F	0.640596	2	orig_h	0.412462	resp_h	0.360622	hora	0.11648
192168202110	192168229156	2012	3	16	18	32	F	0.640513	2	orig_h	0.420165	resp_h	0.360669	hora	0.116495
192.168.202.76	192168229156	2012	3	16	18	35	F	0.639947	2	orig_h	0.41288	resp_h	0.360987	hora	0.116598
192168202110	192168229156	2012	3	16	18	31	F	0.639671	2	orig_h	0.420718	resp_h	0.361143	hora	0.116649
192168202110	192168229156	2012	3	16	18	30	F	0.639096	2	orig_h	0.421097	resp_h	0.361468	hora	0.116754
192.168.202.76	192168229156	2012	3	16	18	23	F	0.638794	2	orig_h	0.413626	resp_h	0.361639	hora	0.116809
192.168.202.76	192168229156	2012	3	16	18	34	F	0.638169	2	orig_h	0.414031	resp_h	0.361993	hora	0.116923
192.168.202.76	192168229156	2012	3	16	18	24	F	0.637231	2	orig_h	0.41464	resp_h	0.362526	hora	0.117095
192.168.202.76	192168229156	2012	3	16	18	33	F	0.636771	2	orig_h	0.414939	resp_h	0.362788	hora	0.11718
192.168.202.76	192168229156	2012	3	16	18	25	F	0.636021	2	orig_h	0.415429	resp_h	0.363216	hora	0.117318
192.168.202.76	192168229156	2012	3	16	18	32	F	0.635613	2	orig_h	0.415695	resp_h	0.363449	hora	0.117393
192.168.202.76	192168229156	2012	3	16	18	26	F	0.635051	2	orig_h	0.416064	resp_h	0.363771	hora	0.117497
192.168.202.76	192168229156	2012	3	16	18	31	F	0.634807	2	orig_h	0.416223	resp_h	0.36391	hora	0.117542
192.168.202.76	192168229156	2012	3	16	18	27	F	0.634432	2	orig_h	0.416469	resp_h	0.364125	hora	0.117612
192.168.202.76	192168229156	2012	3	16	18	30	F	0.634241	2	orig_h	0.416594	resp_h	0.364235	hora	0.117647
192.168.202.76	192168229156	2012	3	16	18	28	F	0.634054	2	orig_h	0.416718	resp_h	0.364343	hora	0.117682
192.168.202.76	192168229156	2012	3	16	18	29	F	0.634028	2	orig_h	0.416735	resp_h	0.364358	hora	0.117687
